# Supplementary material
Source: publisher site journal article supplement (https://www.spandidos-publications.com/8405/downloadSupplementary)
Supplement: Supplementary file 1 [file downloadSupplementary]

## Sheet: Sheet1
Table SIV. PINK1 single gene differential analysis results.
gene_name	baseMean	log2FoldChange	lfcSE	stat	pvalue	padj	sig
DDX11L1	0.217193	-0.328099	0.29427	-1.11496	0.264867	0.318031	none
WASH7P	50.368	-0.254945	0.0721202	-3.535	0.00040777	0.00081971	none
MIR6859-1	1.46734	0.101296	0.114419	0.885307	0.375991	0.431816	none
MIR1302-2HG	0.0828023	0.00257295	0.456441	0.00563697	0.995502		none
MIR1302-2	0
FAM138A	0.028423	-0.142885	1.09221	-0.130821	0.895917		none
OR4G4P	0.0281474	-0.189582	1.45338	-0.130442	0.896217		none
OR4G11P	0.0909666	-0.293036	1.10316	-0.265633	0.790522		none
OR4F5	0.0584937	-0.153179	0.954728	-0.160443	0.872532		none
AL627309.1	1.04061	-0.329499	0.157014	-2.09853	0.0358583	0.0527903	none
AL627309.3	0
CICP27	4.08062	-0.719113	0.111591	-6.44416	1.16242e-10	4.96684e-10	none
AL627309.6	83.3203	-0.522495	0.096171	-5.43298	5.54201e-08	1.79001e-07	none
AL627309.7	46.3472	-0.278652	0.0940123	-2.96399	0.00303677	0.00537952	none
AL627309.2	0.637987	-0.48988	0.168601	-2.90556	0.00366595	0.00641949	none
AL627309.5	11.7788	-0.0265179	0.0741319	-0.357713	0.720558	0.758128	none
RNU6-1100P	0.026554	-0.174004	1.30894	-0.132935	0.894245		none
AL627309.4	0.0204812	-0.153332	2.05688	-0.0745457	0.940576		none
FO538757.1	3.10332	0.175985	0.152445	1.15442	0.248329	0.300695	none
WASH9P	103.859	-0.155537	0.049626	-3.13418	0.00172336	0.00316755	none
MIR6859-2	0.483452	0.175223	0.177255	0.988537	0.32289	0.377909	none
AP006222.1	17.3613	-0.0355108	0.0753683	-0.471164	0.637524	0.68231	none
AP006222.2	1.45672	-0.912959	0.207851	-4.39238	1.12118e-05	2.76396e-05	none
RPL23AP24	0.043983	-0.158378	0.769677	-0.205772	0.836969		none
AL732372.1	0.216375	-0.597634	0.322303	-1.85426	0.0637018	0.08921	none
AL732372.2	25.5274	-0.138934	0.0715755	-1.94109	0.0522475	0.074394	none
WBP1LP7	0.00679005	-0.117084	2.88795	-0.0405423	0.967661		none
OR4F29	0.00989196	-0.101502	2.14694	-0.0472777	0.962292		none
CICP7	0.0136599	-0.0703627	1.55338	-0.0452965	0.963871		none
AL732372.3	0.124579	-0.0594555	0.354974	-0.167493	0.866982		none
U6	0.0341686	-0.19997	1.38916	-0.14395	0.88554		none
AL669831.3	5.88717	0.00481863	0.0632221	0.0762175	0.939246	0.948366	none
AC114498.1	0.00237312	-0.101544	2.88795	-0.0351611	0.971951		none
MTND1P23	1095.8	-1.20615	0.185343	-6.50766	7.63328e-11	3.32467e-10	down
MTND2P28	7445.66	-0.75449	0.0747328	-10.0958	5.76353e-24	8.31916e-23	none
MTCO1P12	5066.38	-0.682481	0.0702754	-9.71152	2.69283e-22	3.3487e-21	none
AC114498.2	0
MTCO2P12	71.6869	-1.21589	0.0729844	-16.6596	2.5788e-62	1.75116e-59	down
MTATP8P1	6.89187	-0.315415	0.0946547	-3.33226	0.000861422	0.00165363	none
MTATP6P1	18918.4	-0.667465	0.0590909	-11.2956	1.38026e-29	3.43287e-28	none
MTCO3P12	146.455	-0.206877	0.0950576	-2.17633	0.0295307	0.0442334	none
WBP1LP6	0.0639059	-0.116796	0.685767	-0.170315	0.864763		none
OR4F16	0.00271978	-0.101544	2.88795	-0.0351611	0.971951		none
CICP3	1.69805	0.337913	0.11263	3.0002	0.00269806	0.00482183	none
AL669831.1	102.044	0.180756	0.0459103	3.93716	8.24527e-05	0.000182118	none
RNU6-1199P	0.142535	-0.339714	0.561878	-0.604605	0.545441		none
AL669831.2	0.147985	-0.443551	0.666372	-0.665621	0.505653		none
LINC01409	61.2888	-0.670612	0.0653591	-10.2604	1.06252e-24	1.65808e-23	none
AL669831.6	0
AL669831.4	6.54724	-0.457244	0.0699305	-6.53855	6.21183e-11	2.73291e-10	none
FAM87B	9.87968	-0.232602	0.0686388	-3.38878	0.000702042	0.00136445	none
LINC01128	856.513	0.200523	0.0344069	5.82798	5.61026e-09	2.0112e-08	none
LINC00115	27.6762	-0.293833	0.0548219	-5.35977	8.33284e-08	2.64333e-07	none
AL669831.7	2.10999	-0.372312	0.131538	-2.83046	0.00464814	0.00801202	none
FAM41C	0.719052	-0.243198	0.170944	-1.42268	0.15483	0.198245	none
TUBB8P11	1.3485	-0.0501569	0.117467	-0.426986	0.66939	0.711423	none
AL669831.5	0.157635	0.117375	0.38288	0.306558	0.75918		none
AL645608.6	10.9995	-0.899521	0.125518	-7.16647	7.69576e-13	4.0702e-12	none
AL645608.2	29.5765	-0.856667	0.121041	-7.07748	1.46802e-12	7.54776e-12	none
AL645608.4	0.115794	-0.313745	0.620199	-0.505878	0.612942		none
LINC02593	331.864	0.275833	0.115892	2.38009	0.0173086	0.0271038	none
SAMD11	410.671	0.164051	0.114468	1.43316	0.151811	0.194786	none
NOC2L	5382.37	-0.0741691	0.0392318	-1.89053	0.0586866	0.0827294	none
KLHL17	409.034	-0.177633	0.0516847	-3.43685	0.000588514	0.00115664	none
PLEKHN1	300.135	0.0437494	0.0625732	0.699172	0.484445	0.537968	none
PERM1	27.3111	0.129117	0.0854323	1.51133	0.130704	0.170332	none
AL645608.7	129.519	-0.726918	0.0900616	-8.07135	6.95249e-16	4.89624e-15	none
HES4	456.84	-0.354783	0.0795343	-4.46076	8.1671e-06	2.05072e-05	none
ISG15	7676.75	-0.595238	0.104478	-5.69723	1.21771e-08	4.21919e-08	none
AL645608.3	1.11129	-0.696071	0.161182	-4.31853	1.57071e-05	3.80767e-05	none
AL645608.1	8.67805	-0.312756	0.0790806	-3.9549	7.65653e-05	0.00016991	none
AGRN	13756.5	0.399659	0.0491355	8.13381	4.1601e-16	2.99562e-15	none
AL645608.5	0
AL390719.1	208.058	0.101497	0.0681304	1.48975	0.136291	0.176831	none
AL645608.8	7.55393	0.369378	0.101697	3.63214	0.000281084	0.000577634	none
RNF223	223.074	0.0525314	0.0836482	0.628004	0.530001	0.581825	none
C1orf159	828.946	-0.127376	0.0481927	-2.64306	0.00821595	0.0135996	none
AL390719.3	16.9342	-0.358634	0.0740787	-4.84126	1.2902e-06	3.56674e-06	none
LINC01342	20.0218	0.529257	0.110014	4.81082	1.50313e-06	4.12284e-06	none
MIR200B	2.68443	0.63858	0.132727	4.81122	1.5001e-06	4.11591e-06	none
MIR200A	4.72265	0.583052	0.113865	5.12055	3.04642e-07	9.08714e-07	none
MIR429	12.6413	0.290397	0.0875815	3.31573	0.000914025	0.00174802	none
AL390719.2	149.519	-0.163327	0.0783662	-2.08415	0.0371463	0.0545111	none
TTLL10-AS1	3.77002	0.174341	0.109297	1.59511	0.110687	0.146613	none
TTLL10	20.3887	0.0710944	0.0796196	0.892926	0.371897	0.42765	none
TNFRSF18	579.731	-0.372701	0.0936946	-3.97783	6.95479e-05	0.000155167	none
TNFRSF4	234.601	-0.343232	0.0714262	-4.8054	1.54439e-06	4.23031e-06	none
SDF4	7803.79	0.157061	0.03701	4.24373	2.19834e-05	5.23485e-05	none
B3GALT6	1846.4	-0.0287716	0.0406218	-0.708281	0.478771	0.532577	none
C1QTNF12	46.1397	-0.365323	0.0923691	-3.95503	7.65241e-05	0.000169835	none
AL162741.1	9.3646	-0.450254	0.074193	-6.06869	1.28958e-09	4.9517e-09	none
UBE2J2	2621.62	-0.0597645	0.0335212	-1.78289	0.0746044	0.102928	none
LINC01786	24.0932	0.34454	0.075172	4.58335	4.57582e-06	1.18584e-05	none
SCNN1D	266.641	0.0859815	0.0767425	1.12039	0.262548	0.315702	none
ACAP3	2208.52	0.0449986	0.0476119	0.945114	0.344601	0.399977	none
MIR6726	0.00756669	-0.111884	2.73819	-0.0408607	0.967407		none
PUSL1	532.84	-0.318508	0.0504192	-6.31719	2.66356e-10	1.0971e-09	none
INTS11	4567.54	0.0440798	0.0334546	1.3176	0.187637	0.23491	none
MIR6727	0
AL139287.1	149.085	-0.129982	0.0412873	-3.14824	0.00164255	0.00302785	none
CPTP	1963.72	-0.112947	0.0481283	-2.3468	0.0189356	0.0294539	none
TAS1R3	152.331	-0.314663	0.0948029	-3.31913	0.000902977	0.00172807	none
DVL1	3204.57	0.0650029	0.0474168	1.37088	0.170412	0.215761	none
MIR6808	0
MXRA8	8140.68	0.173471	0.0683622	2.53752	0.011164	0.0180611	none
AURKAIP1	4082.26	-0.278413	0.057716	-4.82385	1.40813e-06	3.87507e-06	none
NDUFB4P8	1.65745	-0.351762	0.0973421	-3.61367	0.000301898	0.000618054	none
CCNL2	5109.22	0.0210237	0.0465521	0.451615	0.651546	0.695113	none
MRPL20-AS1	1085.04	0.103471	0.0377719	2.73938	0.00615559	0.0103965	none
MRPL20	3404.8	-0.157567	0.0377031	-4.17915	2.92595e-05	6.85208e-05	none
RN7SL657P	0
MRPL20-DT	171.655	-0.266534	0.0544677	-4.89344	9.90871e-07	2.77746e-06	none
ANKRD65	400.715	0.136671	0.0747869	1.82747	0.0676288	0.0942091	none
AL391244.1	15.103	0.153273	0.0939772	1.63096	0.102898	0.137355	none
TMEM88B	1.63142	0.418306	0.131935	3.17056	0.00152147	0.00281868	none
LINC01770	109.432	-0.134334	0.0824893	-1.62851	0.103418	0.137966	none
VWA1	6458.56	-0.0343371	0.0554353	-0.619408	0.535647	0.587333	none
ATAD3C	495.466	-0.012996	0.0909224	-0.142935	0.886341	0.904031	none
ATAD3B	987.402	-0.415005	0.060383	-6.87288	6.29187e-12	3.05878e-11	none
AL645728.2	27.5482	-0.23372	0.0666213	-3.50819	0.000451163	0.000900357	none
ATAD3A	1346.19	-0.369141	0.0540479	-6.82989	8.49789e-12	4.07161e-11	none
TMEM240	39.0932	0.102486	0.070621	1.45122	0.146719	0.188923	none
SSU72	7332.74	-0.272701	0.0335896	-8.11861	4.71553e-16	3.37605e-15	none
AL645728.1	47.0096	-0.0694284	0.0500297	-1.38774	0.165215	0.210048	none
AL691432.3	0.0624715	-0.163465	0.636676	-0.256747	0.797374		none
FNDC10	1132.77	-0.247659	0.0647038	-3.82759	0.000129406	0.000278231	none
AL691432.4	69.6648	0.277715	0.0740419	3.75079	0.000176282	0.000371828	none
AL691432.2	363.413	0.189851	0.0473792	4.00705	6.14815e-05	0.000138071	none
MIB2	1209.53	0.222947	0.0549515	4.05716	4.96724e-05	0.000113012	none
MMP23B	6.46883	0.50866	0.108421	4.69151	2.71198e-06	7.22325e-06	none
CDK11B	1646.07	0.0559082	0.0300551	1.86019	0.0628586	0.0881224	none
FO704657.1	1.61569	0.327546	0.0926903	3.53377	0.000409678	0.000823324	none
SLC35E2B	3559.82	0.457602	0.0434549	10.5305	6.25028e-26	1.09338e-24	none
AL691432.1	91.9127	0.334683	0.0731776	4.57357	4.79483e-06	1.23951e-05	none
MMP23A	12.3881	0.170454	0.144074	1.1831	0.236769	0.288372	none
CDK11A	56.8168	-0.293693	0.05598	-5.24639	1.5511e-07	4.78934e-07	none
AL031282.2	70.6058	0.309049	0.0552613	5.5925	2.23827e-08	7.53962e-08	none
AL031282.1	312.138	0.388272	0.0631537	6.14804	7.84465e-10	3.07999e-09	none
SLC35E2A	129.92	0.378139	0.0533323	7.09025	1.33871e-12	6.92099e-12	none
NADK	3440.97	0.157874	0.027254	5.7927	6.92636e-09	2.46194e-08	none
GNB1	25710	0.128356	0.0259572	4.94491	7.61793e-07	2.16528e-06	none
AL109917.1	24.4869	-0.272696	0.0763997	-3.56934	0.000357885	0.000725154	none
CALML6	34.2087	-0.254231	0.095104	-2.6732	0.00751325	0.0125187	none
TMEM52	129.597	-0.521504	0.0860541	-6.06019	1.35962e-09	5.2095e-09	none
CFAP74	35.7606	0.0435883	0.105477	0.413251	0.679423	0.720719	none
AL391845.2	15.1391	0.152698	0.067219	2.27164	0.0231082	0.0353698	none
GABRD	237.101	0.114746	0.068805	1.66769	0.0953768	0.128373	none
AL391845.1	1.67813	-0.220308	0.134377	-1.63948	0.101113	0.135274	none
PRKCZ	793.845	0.216654	0.0380584	5.69265	1.25081e-08	4.32618e-08	none
AL590822.2	4.96719	-0.642357	0.102431	-6.27113	3.58438e-10	1.45762e-09	none
PRKCZ-AS1	102.384	0.244048	0.0476018	5.12687	2.94606e-07	8.80419e-07	none
FAAP20	2011.18	-0.0193199	0.0513936	-0.37592	0.706976	0.745676	none
AL590822.1	1.79904	-0.184899	0.130193	-1.42019	0.155553	0.199073	none
SKI	5642.91	0.113733	0.0332953	3.41589	0.000635751	0.00124272	none
AL590822.3	117.732	0.260981	0.078216	3.33667	0.000847874	0.0016288	none
MORN1	483.7	0.341156	0.0468656	7.27945	3.3518e-13	1.82884e-12	none
AL589739.1	6.88749	0.146604	0.105616	1.38808	0.165112	0.209971	none
AL513477.1	171.443	0.412755	0.0610607	6.75974	1.38237e-11	6.48946e-11	none
AL513477.2	25.174	-0.240502	0.0642238	-3.74475	0.000180576	0.000380438	none
RER1	6242.71	-0.0634011	0.0300488	-2.10994	0.0348636	0.0514545	none
PEX10	816.405	0.214398	0.034559	6.20383	5.51067e-10	2.20044e-09	none
PLCH2	470.326	0.582507	0.0847651	6.87201	6.33021e-12	3.07442e-11	none
AL139246.1	4.35021	0.653469	0.125531	5.20565	1.9332e-07	5.90368e-07	none
AL139246.4	4.3717	0.568371	0.132308	4.29582	1.74048e-05	4.19584e-05	none
PANK4	1115.66	0.210415	0.0291567	7.21669	5.32683e-13	2.85537e-12	none
HES5	7.19911	-0.0936587	0.096906	-0.966491	0.333799	0.389072	none
AL139246.5	100.287	0.00619263	0.0872828	0.070949	0.943438	0.951827	none
TNFRSF14-AS1	158.72	0.741212	0.0714451	10.3746	3.23675e-25	5.30788e-24	none
TNFRSF14	2239.48	0.0921051	0.0535757	1.71916	0.0855858	0.116511	none
AL139246.2	4.56039	0.22411	0.0852038	2.63028	0.00853141	0.0140864	none
AL139246.3	12.1536	-0.301829	0.0722423	-4.17801	2.94071e-05	6.88377e-05	none
PRXL2B	2562.79	0.327788	0.0428409	7.65129	1.9897e-14	1.22257e-13	none
MMEL1	145.318	0.197371	0.0739778	2.66797	0.00763104	0.0126985	none
MMEL1-AS1	0.0696542	-0.132244	0.867163	-0.152502	0.878791		none
TTC34	72.8669	0.652667	0.0866177	7.53503	4.88221e-14	2.87924e-13	none
AC242022.2	0.725098	0.550865	0.210802	2.61318	0.00897038	0.0147616	none
AC242022.1	0.992692	1.06223	0.201345	5.27567	1.32271e-07	4.11019e-07	up
AL592464.2	0.0197783	-0.137763	1.9448	-0.0708366	0.943528		none
AL592464.3	0.249764	-0.430572	0.52866	-0.814458	0.415383	0.470587	none
AL592464.1	0.0798753	0.0699525	0.898639	0.0778427	0.937953		none
AL589702.1	0.11273	-0.0387945	0.551673	-0.0703215	0.943938		none
ACTRT2	0.0809017	-0.236035	0.932508	-0.253119	0.800177		none
PRDM16-DT	20.5283	0.387991	0.0925466	4.19238	2.76045e-05	6.48994e-05	none
PRDM16	77.9343	0.266116	0.0819352	3.24788	0.00116268	0.00219037	none
MIR4251	0.0457598	-0.148018	1.00314	-0.147554	0.882694		none
AL008733.1	0.889593	-0.905412	0.274748	-3.29543	0.00098271	0.00186996	none
AL512383.1	0.31509	-0.740395	0.280621	-2.63841	0.0083295	0.0137713	none
AL590438.1	4.56474	-0.126126	0.0947994	-1.33046	0.183368	0.23026	none
AL354743.2	8.00502	-0.148765	0.0783545	-1.89861	0.0576156	0.0813475	none
AL354743.1	2.6293	0.520307	0.136056	3.8242	0.000131197	0.000281812	none
ARHGEF16	1537.69	0.258886	0.0518572	4.99228	5.96719e-07	1.71897e-06	none
AL512413.1	7.74849	-0.56201	0.0856283	-6.56336	5.2607e-11	2.33117e-10	none
MEGF6	2070.6	0.389245	0.0629672	6.18171	6.3409e-10	2.51671e-09	none
MIR551A	0.0671455	-0.324183	0.897209	-0.361323	0.717858		none
AL513320.1	17.6564	-0.100561	0.0756547	-1.32922	0.183777	0.230721	none
TPRG1L	4001	0.167658	0.0303458	5.5249	3.29675e-08	1.09088e-07	none
WRAP73	1249.35	-0.0551039	0.031117	-1.77086	0.0765841	0.105358	none
TP73	302.05	0.344385	0.0712596	4.83282	1.3461e-06	3.71144e-06	none
TP73-AS3	4.05998	0.267994	0.133016	2.01475	0.0439307	0.0635125	none
TP73-AS2	0.708906	-0.41216	0.191913	-2.14764	0.0317423	0.047246	none
TP73-AS1	1333.7	0.371612	0.0349003	10.6478	1.78516e-26	3.30199e-25	none
AL136528.1	0
CCDC27	5.86505	0.162305	0.0899174	1.80505	0.0710671	0.0985118	none
SMIM1	164.635	0.0523186	0.0737842	0.709076	0.478277	0.532134	none
LRRC47	3213.11	0.0016902	0.026366	0.0641055	0.948886	0.956333	none
RN7SL574P	8.3047	-0.0547002	0.0788235	-0.693957	0.487709	0.54111	none
AL365330.1	29.7791	0.121127	0.0521342	2.32338	0.0201588	0.0311985	none
CEP104	2325.19	0.221661	0.0257053	8.62313	6.5147e-18	5.55404e-17	none
DFFB	376.769	-0.0618344	0.0327466	-1.88827	0.0589899	0.0831282	none
C1orf174	1276.5	-0.146383	0.0251037	-5.83112	5.50556e-09	1.97525e-08	none
LINC01134	31.8169	-0.215649	0.0690163	-3.12461	0.00178039	0.00326582	none
LINC01346	0.358193	0.0361261	0.273777	0.131955	0.89502	0.911307	none
LINC01345	0.156425	0.00805529	0.453192	0.0177746	0.985819		none
LINC02780	0.600605	-1.41371	0.403126	-3.50685	0.00045344	0.00090466	down
AL805961.1	0.869582	-1.02807	0.183664	-5.59752	2.17437e-08	7.3299e-08	down
EEF1DP6	0.221562	-0.16917	0.233826	-0.723488	0.46938	0.523652	none
LINC01777	0.921932	0.0264653	0.292559	0.0904615	0.927921	0.93894	none
AL355602.1	0.138577	-0.324182	0.619166	-0.523578	0.600572		none
Z98747.1	0.00833387	-0.132624	2.71617	-0.0488274	0.961057		none
LINC01646	0.126903	-0.298267	0.434221	-0.686903	0.492144		none
AJAP1	72.9638	0.621203	0.0840358	7.39211	1.44513e-13	8.17261e-13	none
Z98886.1	1.20995	0.113625	0.227652	0.499117	0.617697	0.663788	none
BX005132.1	0.0257904	-0.174036	2.48964	-0.0699041	0.94427		none
LINC02781	0.0849066	-0.251576	1.10296	-0.228091	0.819576		none
LINC02782	0.0554709	-0.215351	0.756599	-0.284631	0.775927		none
AL139823.1	0.0759231	-0.179072	1.13161	-0.158245	0.874264		none
Z98259.3	1.85854	-0.690116	0.27119	-2.54477	0.010935	0.017715	none
Z98259.2	0.10551	-0.189245	0.758991	-0.249338	0.8031		none
Z98259.1	0.292095	-0.356961	0.379547	-0.940494	0.346964	0.402325	none
Z97988.2	0.00941806	-0.106715	2.88795	-0.0369516	0.970524		none
AL365255.1	1.64115	-0.207009	0.184366	-1.12282	0.261515	0.31459	none
Z97988.1	0.0370239	-0.0806002	0.882324	-0.0913499	0.927215		none
MIR4689	0.21432	0.175613	0.235447	0.745868	0.455747	0.510285	none
NPHP4	847.655	0.244833	0.0323664	7.5644	3.89669e-14	2.32391e-13	none
KCNAB2	1263.76	-0.0751281	0.0532104	-1.41191	0.157978	0.201889	none
CHD5	34.2709	-0.270407	0.11344	-2.38371	0.0171393	0.0268584	none
AL031847.1	0.12635	-0.318961	0.485106	-0.657508	0.510854		none
RPL22	8052.85	0.0790381	0.0352191	2.24418	0.0248208	0.0377654	none
RNF207-AS1	26.4568	-0.160756	0.0764517	-2.10272	0.0354905	0.0523073	none
RNF207	477.062	-0.0690869	0.0584982	-1.18101	0.237599	0.289185	none
ICMT	6523.21	0.110679	0.0251736	4.39662	1.09948e-05	2.71439e-05	none
LINC00337	25.7006	-0.633639	0.078562	-8.06546	7.29593e-16	5.12121e-15	none
HES3	0.099299	-0.127035	0.582243	-0.218183	0.827287		none
GPR153	928.589	0.257802	0.055615	4.63548	3.5611e-06	9.35641e-06	none
ACOT7	1897.46	-0.161266	0.0535769	-3.00999	0.00261254	0.00467756	none
AL031848.2	12.595	-0.166692	0.0666828	-2.49977	0.0124273	0.019943	none
HES2	382.684	0.345877	0.115769	2.98764	0.00281139	0.00500758	none
ESPN	1362.67	0.272884	0.0863898	3.15875	0.00158445	0.00292856	none
MIR4252	0.242308	-0.158875	0.238428	-0.666345	0.505191	0.55824	none
AL031848.1	20.2321	0.47535	0.1143	4.15881	3.1991e-05	7.45397e-05	none
TNFRSF25	445.633	-0.147336	0.0659397	-2.23441	0.0254561	0.0386428	none
PLEKHG5	918.403	0.5135	0.0509676	10.075	7.12408e-24	1.0227e-22	none
NOL9	1515.06	-0.072979	0.0285659	-2.55475	0.0106263	0.0172522	none
RNU6-731P	0.547153	-1.02745	0.238617	-4.30587	1.66332e-05	4.01913e-05	down
AL591866.1	5.36566	-0.520779	0.0913925	-5.69827	1.21031e-08	4.19551e-08	none
TAS1R1	12.6144	-0.0831695	0.0966602	-0.860432	0.389551	0.44521	none
ZBTB48	1064.58	0.106965	0.0375473	2.84881	0.00438829	0.00758863	none
KLHL21	3056.23	0.226276	0.0447623	5.05507	4.30239e-07	1.26013e-06	none
PHF13	2338.38	0.12185	0.0251804	4.83907	1.30449e-06	3.60336e-06	none
THAP3	744.779	0.00342797	0.038085	0.0900083	0.928281	0.93922	none
DNAJC11	1717.64	0.13661	0.0295828	4.61788	3.87677e-06	1.01317e-05	none
LINC01672	0.27905	-0.254152	0.234207	-1.08516	0.27785	0.331771	none
AL591163.1	0.213593	-0.22173	0.258792	-0.856788	0.391562	0.447188	none
CAMTA1-DT	14.5024	-0.469538	0.0683345	-6.87118	6.3675e-12	3.09186e-11	none
CAMTA1	1853.93	-0.176869	0.0344943	-5.12748	2.93653e-07	8.77748e-07	none
AL590128.1	1.3834	-2.7171	0.244875	-11.0959	1.31403e-28	2.99096e-27	down
AL512330.1	0.0711546	-0.230873	0.742049	-0.311129	0.755702		none
RNU1-8P	0.246262	-1.1277	0.767879	-1.46858	0.141945	0.183377	none
CAMTA1-IT1	0.93292	-0.545604	0.152448	-3.57896	0.000344964	0.000700494	none
CAMTA1-AS2	0.396977	-0.554675	0.274687	-2.0193	0.0434566	0.062902	none
CAMTA1-AS1	2.28332	0.202826	0.12853	1.57805	0.114555	0.151235	none
AL359881.3	6.66772	-0.35055	0.116488	-3.00932	0.00261835	0.00468779	none
AL359881.2	8.07019	-0.220948	0.106159	-2.08129	0.037407	0.054848	none
AL359881.1	13.3176	-0.329991	0.100557	-3.28164	0.00103206	0.00195771	none
VAMP3	5405.95	0.169443	0.0229755	7.37491	1.64454e-13	9.24432e-13	none
Z98884.2	22.5201	-0.22049	0.0483627	-4.55909	5.13757e-06	1.32407e-05	none
PER3	1552.34	0.399811	0.0522544	7.65124	1.99052e-14	1.22291e-13	none
Z98884.1	7.73354	-0.281071	0.0872404	-3.2218	0.00127387	0.00238631	none
UTS2	15.0984	-0.924979	0.119558	-7.73663	1.02084e-14	6.44939e-14	none
TNFRSF9	210.673	-0.562394	0.0877578	-6.40848	1.46977e-10	6.21672e-10	none
AL009183.1	0.0957281	-0.132206	0.452303	-0.292295	0.770061		none
PARK7	11636.3	-0.0315335	0.035505	-0.888142	0.374464	0.430227	none
Y_RNA	0.0774259	-0.308707	0.948345	-0.325522	0.744786		none
AL034417.4	32.9662	-0.526156	0.0608133	-8.65199	5.06071e-18	4.35338e-17	none
AL034417.3	3.18525	-0.667676	0.0874222	-7.63737	2.21708e-14	1.35559e-13	none
ERRFI1	4888.42	0.125766	0.0608874	2.06555	0.0388714	0.0568324	none
AL034417.2	11.4414	-0.248784	0.0811758	-3.06476	0.00217847	0.00394292	none
AL034417.1	1.70701	-0.173852	0.0920192	-1.8893	0.058851	0.0829377	none
AL358876.1	0.305912	-0.255813	0.239181	-1.06954	0.284828	0.338947	none
LINC01714	2.55256	-0.739787	0.153024	-4.83444	1.33524e-06	3.68241e-06	none
RNU1-7P	0.0502954	-0.158388	1.17252	-0.135084	0.892546		none
AL358876.2	0.123977	-0.137295	0.404524	-0.3394	0.734308		none
RNU6-991P	0.062314	-0.137536	0.686026	-0.200482	0.841104		none
SLC45A1	175.005	0.568642	0.0645228	8.81304	1.21794e-18	1.0961e-17	none
RERE	8340.77	0.339497	0.0293718	11.5586	6.67864e-31	1.88017e-29	none
RERE-AS1	14.0003	-1.37958	0.0990074	-13.9341	3.93019e-44	4.24441e-42	down
AL096855.1	2.6906	-1.75025	0.146469	-11.9496	6.52263e-33	2.22305e-31	down
AL096855.2	3.1373	-1.40033	0.143423	-9.76368	1.61192e-22	2.05003e-21	down
RPL7P11	3.64654	-1.54465	0.128689	-12.003	3.42619e-33	1.20059e-31	down
RPL7P7	2.74235	-1.51315	0.145099	-10.4284	1.83878e-25	3.08423e-24	down
AL357552.1	1.38402	-2.6104	0.250407	-10.4246	1.91411e-25	3.20578e-24	down
AL357552.2	2.38982	-2.878	0.225936	-12.7381	3.6315e-37	1.93329e-35	down
RPL23AP19	0.547584	-0.432248	0.142146	-3.04087	0.00235896	0.00424935	none
ENO1	54526.6	-0.42116	0.0521304	-8.07898	6.53093e-16	4.6095e-15	none
MIR6728	0.572156	-0.919392	0.170895	-5.37988	7.45357e-08	2.37474e-07	none
ENO1-AS1	6.38489	-0.434279	0.0757188	-5.73542	9.72717e-09	3.40934e-08	none
RNU6-304P	0.582496	-0.0194994	0.149281	-0.130622	0.896074	0.912107	none
HMGN2P17	102.782	-0.268969	0.0462405	-5.81673	6.00103e-09	2.14511e-08	none
AL139415.1	0.508775	-0.469828	0.194658	-2.41361	0.0157954	0.0248899	none
AL139415.2	0.425027	-0.780165	0.169318	-4.60769	4.07165e-06	1.06119e-05	none
CA6	31.4592	-2.42795	0.21226	-11.4386	2.6824e-30	7.15497e-29	down
RN7SL451P	0.430416	-1.31927	0.4422	-2.98342	0.00285046	0.00507153	down
SLC2A7	1.67009	-0.337543	0.115114	-2.93226	0.00336509	0.00592484	none
SLC2A5	351.287	-0.560181	0.0811365	-6.90418	5.04941e-12	2.47706e-11	none
AL158048.1	0.0721576	-0.32941	1.13441	-0.290381	0.771525		none
GPR157	1433.21	-0.0252366	0.0493814	-0.511053	0.609314	0.655785	none
MIR34AHG	277.75	-0.00575486	0.0564543	-0.101938	0.918806	0.931336	none
MIR34A	0
LNCTAM34A	50.8281	-0.115334	0.0568476	-2.02882	0.0424764	0.0616385	none
H6PD	6163.77	0.344516	0.0344032	10.014	1.32231e-23	1.85378e-22	none
SPSB1	2283.13	0.0359564	0.0513859	0.699733	0.484094	0.537654	none
BX323043.1	17.0292	0.282702	0.0637866	4.43199	9.33674e-06	2.32733e-05	none
LINC02606	75.3752	0.442494	0.0433538	10.2066	1.85301e-24	2.81806e-23	none
RNA5SP40	0.226788	-0.105894	0.237587	-0.445708	0.655808	0.698944	none
AL928921.1	1.63714	0.804694	0.197857	4.06705	4.76125e-05	0.000108579	none
SLC25A33	762.312	-0.399875	0.0463767	-8.62232	6.56083e-18	5.59124e-17	none
AL954705.1	9.77003	-0.264916	0.0708541	-3.73889	0.000184836	0.000388847	none
TMEM201	1201.87	-0.230244	0.0387666	-5.93923	2.86361e-09	1.0584e-08	none
PIK3CD	1125.94	-0.158584	0.0616468	-2.57246	0.0100979	0.0164708	none
PIK3CD-AS1	5.94143	-0.6791	0.0962531	-7.05536	1.72151e-12	8.80055e-12	none
AL691449.1	0.249803	-0.6783	0.384658	-1.76339	0.0778355	0.106935	none
PIK3CD-AS2	63.5707	-0.426552	0.0834499	-5.11148	3.19652e-07	9.50199e-07	none
CLSTN1	15348.7	0.241002	0.0331687	7.26596	3.70406e-13	2.01198e-12	none
MZT1P1	0.610912	-1.7018	0.344899	-4.9342	8.04781e-07	2.28037e-06	down
AL357140.3	2.89354	-0.799213	0.108678	-7.35392	1.92472e-13	1.07585e-12	none
CTNNBIP1	2016.01	-0.0843978	0.0436765	-1.93234	0.053318	0.0757691	none
AL357140.1	0
AL357140.4	4.19948	-1.48151	0.124903	-11.8613	1.88047e-32	6.10274e-31	down
LZIC	3142.79	0.088009	0.0254279	3.46112	0.000537929	0.00106347	none
AL357140.2	11.7614	-0.0966382	0.0501554	-1.92678	0.0540074	0.0766662	none
NMNAT1	609.402	0.270892	0.0298509	9.07486	1.13825e-19	1.11628e-18	none
RN7SKP269	4.03993	-1.16591	0.100379	-11.6151	3.45363e-31	1.00184e-29	down
TMEM274P	2.60647	-1.57399	0.143979	-10.9321	8.09697e-28	1.69892e-26	down
MIR5697	0.603963	-1.01161	0.183936	-5.4998	3.80213e-08	1.25122e-07	down
AL603962.1	0
RBP7	661.016	-0.0687834	0.0792101	-0.868366	0.385194	0.440859	none
UBE4B	3820.25	0.0750313	0.0306654	2.44677	0.0144142	0.0228824	none
AL590639.1	0.962305	-1.83695	0.2182	-8.41865	3.80845e-17	3.01887e-16	down
PGAM1P11	1.52705	-0.797492	0.13924	-5.72746	1.01945e-08	3.5642e-08	none
RNU6-828P	1.48408	-0.151489	0.120689	-1.2552	0.209405	0.25886	none
KIF1B	4371.87	0.0169824	0.0417634	0.406635	0.684276	0.725295	none
AL358013.1	0.10985	-0.184065	0.540385	-0.340617	0.733392		none
RNU6-37P	2.85456	-1.79149	0.132024	-13.5694	6.07952e-42	5.36362e-40	down
RN7SL731P	0
AL139424.3	14.0692	-0.212658	0.0665676	-3.19462	0.00140014	0.00260812	none
AL139424.2	30.4123	-0.00185513	0.0548239	-0.033838	0.973006	0.976799	none
PGD	8833.05	-0.154654	0.0416707	-3.71135	0.000206159	0.000430894	none
AL139424.1	0.324132	-0.217592	0.175888	-1.23711	0.216047	0.265967	none
CENPS-CORT	1.53626	0.0417479	0.101746	0.410315	0.681575	0.72278	none
CENPS	80.4264	-0.393835	0.0478171	-8.23628	1.77647e-16	1.32475e-15	none
CORT	7.9388	-0.0312229	0.0679903	-0.459225	0.646072	0.689996	none
DFFA	2618.82	0.0232815	0.0307109	0.758088	0.448398	0.503137	none
AL354956.1	0
PEX14	1209.84	0.0420639	0.0335	1.25564	0.209247	0.258725	none
AL139423.2	11.9778	-0.31352	0.0944506	-3.31941	0.000902074	0.00172641	none
RN7SL614P	1.90269	-0.27459	0.122068	-2.24948	0.0244818	0.0372914	none
CASZ1	2182.29	0.512077	0.0443757	11.5396	8.33382e-31	2.33149e-29	none
AL139423.1	50.5728	0.155846	0.064242	2.42593	0.0152693	0.0241261	none
HSPE1P24	0.0281818	-0.220653	1.15531	-0.19099	0.848533		none
C1orf127	47.568	0.0146129	0.0867233	0.1685	0.86619	0.887079	none
CFL1P6	2.18977	0.274652	0.101013	2.71898	0.00654831	0.01101	none
TARDBP	5055.4	-0.20358	0.0192156	-10.5945	3.15962e-26	5.6985e-25	none
AL109811.3	0
MASP2	66.7889	0.29616	0.0672653	4.40286	1.06834e-05	2.64185e-05	none
AL109811.2	30.7015	0.154284	0.0566296	2.72444	0.00644111	0.0108452	none
SRM	3954.18	-0.431837	0.0488309	-8.84351	9.27583e-19	8.43254e-18	none
EXOSC10	2887.17	0.0835365	0.022816	3.66131	0.000250926	0.000518798	none
AL109811.1	8.01518	-0.0642294	0.0630861	-1.01812	0.30862	0.36338	none
EXOSC10-AS1	23.1992	-0.279012	0.0635577	-4.3899	1.13405e-05	2.79478e-05	none
MTOR	4667.79	0.173039	0.0289499	5.97719	2.27014e-09	8.48496e-09	none
MTOR-AS1	2.70343	-2.56757	0.210647	-12.1889	3.56077e-34	1.40111e-32	down
RNU6-537P	0.250542	-0.65274	0.552619	-1.18118	0.237533	0.289137	none
ANGPTL7	30.8873	1.02387	0.162723	6.29209	3.13219e-10	1.28106e-09	up
RNU6-291P	0.222237	-0.47107	0.310028	-1.51944	0.128651	0.16792	none
RPL39P6	0.60232	-0.763385	0.17327	-4.40576	1.05416e-05	2.60908e-05	none
UBIAD1	1764.03	0.169142	0.0259167	6.52637	6.7381e-11	2.94997e-10	none
UBE2V2P3	2.39675	-0.134051	0.106481	-1.25892	0.208058	0.257475	none
AL031291.1	0.66949	0.10332	0.241587	0.427674	0.668888	0.710957	none
MTCYBP45	0.0509263	-0.205019	0.860248	-0.238325	0.811629		none
DISP3	98.9042	0.323728	0.113493	2.85241	0.0043389	0.00750989	none
AL590989.1	0.025147	-0.127353	1.15722	-0.110051	0.912369		none
LINC01647	1.41957	-0.940641	0.227632	-4.1323	3.59155e-05	8.31522e-05	none
AL031731.1	5.58206	0.362292	0.108488	3.33946	0.000839417	0.00161385	none
FBXO2	993.994	0.275142	0.0979168	2.80996	0.00495476	0.00850619	none
FBXO44	1156.57	0.139097	0.0484716	2.86965	0.0041092	0.00713768	none
FBXO6	1103.42	-0.131507	0.0444874	-2.95604	0.00311618	0.00551127	none
MAD2L2	1853.13	-0.295318	0.0495222	-5.96335	2.47125e-09	9.19369e-09	none
DRAXIN	133.56	-0.271956	0.0931242	-2.92036	0.00349633	0.00614262	none
AGTRAP	3243.08	-0.0976212	0.0437216	-2.23279	0.0255627	0.0387889	none
C1orf167	22.307	0.898854	0.156632	5.73864	9.54423e-09	3.34941e-08	none
C1orf167-AS1	0.472583	0.602383	0.26159	2.30277	0.0212917	0.0328102	none
MTHFR	1728.23	0.466203	0.042472	10.9767	4.94533e-28	1.06124e-26	none
CLCN6	948.547	0.338559	0.0296786	11.4075	3.83667e-30	1.01148e-28	none
AL021155.2	0
AL021155.3	0
NPPA	4.49813	0.12256	0.0823038	1.48912	0.136455	0.177014	none
AL021155.1	0
NPPB	0.555924	-0.224834	0.23756	-0.94643	0.343929	0.399353	none
SBF1P2	0.376383	0.00595406	0.164211	0.0362586	0.971076	0.975189	none
AL021155.4	24.8671	-0.0030177	0.0510259	-0.0591406	0.95284	0.959649	none
RNU5E-1	0
RNU5E-4P	0.883921	-2.05152	0.277069	-7.40436	1.31782e-13	7.48569e-13	down
KIAA2013	4173.04	-0.173967	0.0375806	-4.62917	3.67134e-06	9.62966e-06	none
PLOD1	11734	-0.3339	0.0546254	-6.11254	9.80547e-10	3.80915e-09	none
AL096840.2	2.14804	-0.509391	0.120784	-4.21738	2.4716e-05	5.84242e-05	none
MFN2	7113.25	0.306098	0.025887	11.8244	2.91987e-32	9.26789e-31	none
AL096840.1	0.0312423	-0.122126	0.921823	-0.132483	0.894602		none
MIIP	1308.71	-0.384599	0.050047	-7.68477	1.53276e-14	9.51196e-14	none
MIR6729	0.00715442	-0.127431	2.1906	-0.0581719	0.953612		none
RN7SL649P	0.143795	-0.54334	0.620126	-0.876176	0.380934		none
TNFRSF8	87.7922	-0.335766	0.0770104	-4.36001	1.30057e-05	3.18118e-05	none
RNU6-777P	0.024969	-0.132553	1.51807	-0.087317	0.93042		none
RPL23AP89	0.261383	-0.0322914	0.207939	-0.155293	0.876591	0.895696	none
AL357835.1	0.140952	-0.220369	0.399281	-0.551916	0.581006		none
MIR7846	0.00622548	-0.106715	2.88795	-0.0369516	0.970524		none
TNFRSF1B	2435.41	-0.0187961	0.0588507	-0.319386	0.749434	0.784257	none
MIR4632	0.0780398	-0.127101	0.565597	-0.224719	0.822198		none
RPL10P17	0.262333	-0.188652	0.19861	-0.94986	0.342183	0.397553	none
SNORA70	0.0245288	-0.179259	1.65346	-0.108415	0.913667		none
VPS13D	5670.5	0.285188	0.0379503	7.51477	5.70096e-14	3.34475e-13	none
SNORA59A	5.00116	-0.232678	0.0602534	-3.86166	0.000112621	0.000244097	none
LINC02766	1.75168	0.363166	0.109913	3.30411	0.000952771	0.00181708	none
DHRS3	2955.86	-0.0809657	0.053735	-1.50676	0.131872	0.171675	none
RNU6ATAC18P	2.28536	-0.0366277	0.106871	-0.342729	0.731802	0.768353	none
MIR6730	0.775754	-0.0905379	0.153929	-0.58818	0.556412	0.606997	none
AC254633.1	14.1408	0.0546522	0.0790148	0.69167	0.489144	0.542448	none
AADACL4	0.184654	-0.117371	0.319874	-0.366929	0.713672		none
AC244670.1	0.0309225	-0.132515	1.03514	-0.128016	0.898137		none
AADACL3	0.877926	-0.164562	0.286108	-0.575176	0.565172	0.615121	none
C1orf158	6.93951	-0.079001	0.188648	-0.418775	0.675381	0.717076	none
PRAMEF12	0.470295	-0.463542	0.364805	-1.27066	0.203851	0.252863	none
PRAMEF1	0.203494	-0.572317	0.529633	-1.08059	0.279879	0.333855	none
LINC01784	0.0157331	-0.117032	1.86259	-0.0628331	0.949899		none
PRAMEF11	0.0613101	-0.210153	0.978185	-0.214839	0.829893		none
PRAMEF30P	0.0863581	-0.261936	0.841918	-0.311118	0.755711		none
HNRNPCL1	1.01676	-0.153292	0.107155	-1.43056	0.152557	0.195619	none
PRAMEF2	0.153092	-0.25169	0.516253	-0.487533	0.625881		none
PRAMEF4	0.0538436	-0.236129	1.28612	-0.183597	0.854329		none
PRAMEF10	0.0383394	-0.148056	1.14643	-0.129145	0.897243		none
PRAMEF7	0.0926945	-0.267041	0.816506	-0.327053	0.743628		none
RNU6-1072P	0.00202808	-0.101544	2.88795	-0.0351611	0.971951		none
PRAMEF29P	0.00287937	-0.117103	2.88795	-0.0405488	0.967656		none
PRAMEF6	0.0451706	-0.230967	1.29152	-0.178833	0.858069		none
PRAMEF28P	0.0554238	-0.27239	1.20969	-0.225173	0.821845		none
PRAMEF27	0.0282246	-0.194753	1.64718	-0.118234	0.905882		none
HNRNPCL3	0.145011	-0.147382	0.34412	-0.428288	0.668442		none
PRAMEF25	0.00347633	-0.111904	2.88795	-0.0387486	0.969091		none
PRAMEF34P	0.0133069	-0.0962923	1.69943	-0.0566614	0.954815		none
PRAMEF35P	0.0250453	-0.163673	1.82104	-0.0898785	0.928384		none
HNRNPCL2	0.529616	-0.516163	0.145452	-3.54868	0.000387166	0.000780602	none
PRAMEF36P	0.0159708	-0.0496254	2.08734	-0.0237745	0.981032		none
AC245056.1	0.0027019	-0.117094	2.88795	-0.0405455	0.967658		none
PRAMEF26	0.00251381	-0.117103	2.88795	-0.0405488	0.967656		none
HNRNPCL4	0.0779305	-0.204851	0.48061	-0.426231	0.66994		none
PRAMEF9	0.0222753	-0.163682	1.83145	-0.0893728	0.928786		none
PRAMEF13	0.0505056	-0.277571	1.25111	-0.221859	0.824424		none
PRAMEF18	0.100372	-0.251472	0.632144	-0.397807	0.690772		none
PRAMEF31P	0.0764271	-0.350074	1.02821	-0.340469	0.733504		none
PRAMEF5	0.02875	-0.194762	1.5103	-0.128956	0.897393		none
PRAMEF32P	0.0115575	-0.122253	2.44214	-0.0500596	0.960075		none
RNU6-771P	0.003414	-0.0963542	2.88795	-0.0333642	0.973384		none
PRAMEF8	0.119282	-0.256666	0.644485	-0.39825	0.690446		none
PRAMEF33	0.0238923	-0.142943	1.82516	-0.078318	0.937575		none
PRAMEF15	0.0401968	-0.205048	1.34052	-0.152962	0.878428		none
AC243961.1	0.0136261	-0.168895	2.88795	-0.0584827	0.953364		none
PRAMEF14	0.12592	-0.282649	0.674242	-0.41921	0.675062		none
PRAMEF19	0.0666273	-0.236063	0.934299	-0.252663	0.800529		none
PRAMEF17	0.0997921	-0.256662	0.59739	-0.429638	0.667459		none
PRAMEF20	0.125302	-0.453766	0.583034	-0.778283	0.436402		none
LRRC38	2.67753	0.375752	0.145621	2.58034	0.00987039	0.0161296	none
AL354712.1	0.0240703	-0.0703258	1.65747	-0.0424296	0.966156		none
BRWD1P1	0.0569921	-0.204944	0.611199	-0.335315	0.737388		none
PDPN	1401.6	0.0988277	0.0659911	1.49759	0.134239	0.174412	none
RNA5SP41	0.0369104	-0.0754292	0.815064	-0.0925439	0.926266		none
AL359771.1	0.214753	-0.0229049	0.26108	-0.0877316	0.93009	0.940711	none
AL359771.2	0.281272	0.264962	0.199108	1.33075	0.183272	0.230159	none
PRDM2	3605.36	0.277428	0.0312162	8.8873	6.26117e-19	5.78584e-18	none
KAZN	1674.8	0.35915	0.0480149	7.47998	7.43331e-14	4.31424e-13	none
RNU6-1265P	0.109418	-0.365642	0.891035	-0.410357	0.681544		none
AL357873.1	6.51694	-0.185529	0.130655	-1.41999	0.155612	0.199138	none
KAZN-AS1	19.997	-1.28958	0.138406	-9.31739	1.19239e-20	1.27538e-19	down
TBCAP2	1.17121	-2.46451	0.273741	-9.00309	2.19448e-19	2.10199e-18	down
AL031293.1	1.79035	-1.71909	0.21228	-8.09818	5.57879e-16	3.96873e-15	down
TMEM51-AS1	89.9711	-0.0433099	0.0663972	-0.652285	0.514217	0.566844	none
TMEM51	997.962	-0.109973	0.043124	-2.55015	0.0107677	0.0174653	none
C1orf195	3.0494	-1.97221	0.156508	-12.6013	2.07709e-36	1.02185e-34	down
MFFP1	2.30131	-2.76395	0.201557	-13.713	8.48881e-43	8.05013e-41	down
ZBTB2P1	1.89826	-0.178422	0.0967828	-1.84353	0.065252	0.0911929	none
FHAD1	179.007	0.0989957	0.0531819	1.86146	0.0626799	0.0878882	none
FHAD1-AS1	0.444955	-0.510193	0.168594	-3.02616	0.00247684	0.00444722	none
AL031283.2	6.9586	0.161872	0.0737175	2.19584	0.0281031	0.0422815	none
AL031283.1	7.03032	-0.0965534	0.0807563	-1.19561	0.231847	0.282993	none
EFHD2	3465.7	-0.107537	0.0490402	-2.19283	0.0283198	0.0425832	none
CTRC	3.98132	-0.261127	0.0945802	-2.76091	0.00576412	0.00978139	none
CELA2A	1.51423	0.38488	0.107041	3.59563	0.000323606	0.000659543	none
CELA2B	5.54063	0.496947	0.0803183	6.18722	6.12361e-10	2.43477e-09	none
CASP9	864.54	0.275369	0.0269931	10.2015	1.95333e-24	2.96359e-23	none
DNAJC16	2223.12	0.283093	0.031558	8.97057	2.94983e-19	2.79389e-18	none
SCARNA21B	0.432832	-1.38006	0.430193	-3.208	0.00133663	0.00249657	down
AL121992.3	1.38738	-0.329909	0.118353	-2.78749	0.0053118	0.00907084	none
AGMAT	164.629	-0.420933	0.0557712	-7.54749	4.43728e-14	2.62951e-13	none
AL121992.1	9.54301	0.00667401	0.0717576	0.0930077	0.925897	0.937295	none
CHCHD2P6	25.6709	-0.0313763	0.0487875	-0.643123	0.520145	0.572407	none
RNU7-179P	0.05471	-0.0805439	0.636336	-0.126574	0.899277		none
CD24P1	0.140491	-0.0386897	0.338006	-0.114464	0.90887		none
DDI2	4295.35	0.212836	0.0343931	6.18834	6.08027e-10	2.41797e-09	none
RSC1A1	0
AL121992.2	0.790791	-0.259658	0.164752	-1.57605	0.115014	0.151769	none
PLEKHM2	3483.99	0.186545	0.0287598	6.48629	8.79731e-11	3.8032e-10	none
AL450998.2	16.9944	-0.225405	0.0761741	-2.95907	0.00308566	0.00546181	none
SLC25A34	48.6983	-0.0288954	0.0627628	-0.460391	0.645235	0.689273	none
SLC25A34-AS1	0.691584	0.00335105	0.154661	0.021667	0.982714	0.985198	none
TMEM82	6.78608	0.143683	0.179961	0.798414	0.42463	0.479783	none
FBLIM1	3963.41	-0.0952658	0.0545443	-1.74657	0.0807111	0.11052	none
RPL12P14	5.54703	-0.0909986	0.0678118	-1.34193	0.179619	0.22604	none
UQCRHL	119.094	-0.569946	0.0447063	-12.7487	3.17087e-37	1.70194e-35	none
AL450998.1	39.305	-0.569417	0.0894167	-6.36813	1.91351e-10	8.00146e-10	none
FLJ37453	235.814	0.221904	0.0478479	4.63769	3.52327e-06	9.26461e-06	none
SPEN	6040.84	0.207139	0.03226	6.42093	1.35448e-10	5.75075e-10	none
AL034555.1	1.18937	-2.76749	0.282259	-9.80479	1.07365e-22	1.38551e-21	down
ZBTB17	1399.54	0.0885597	0.0359551	2.46307	0.0137755	0.0219477	none
AL355994.4	0.992547	-1.97291	0.240268	-8.2113	2.18805e-16	1.61822e-15	down
AL355994.1	0.0225395	-0.122192	1.40985	-0.0866705	0.930933		none
AL355994.5	0.0159795	-0.0859138	1.86183	-0.0461449	0.963195		none
TBC1D3P6	0.0917702	0.0493159	0.636571	0.0774713	0.938249		none
SRARP	520.626	0.841351	0.147114	5.71905	1.07118e-08	3.73576e-08	none
AL355994.3	0
HSPB7	232.082	0.780723	0.0922175	8.46611	2.53722e-17	2.04446e-16	none
CLCNKA	48.894	0.00397368	0.0879157	0.0451988	0.963949	0.969199	none
AL355994.2	2.55612	-0.630541	0.155113	-4.06505	4.8023e-05	0.000109465	none
CLCNKB	14.7242	0.171069	0.0961509	1.77917	0.0752119	0.10368	none
FAM131C	30.2586	-0.885233	0.122276	-7.2396	4.50001e-13	2.42843e-12	none
EPHA2	990.929	0.0780723	0.0583095	1.33893	0.180594	0.227158	none
AL451042.2	5.88437	0.142464	0.0853476	1.66922	0.0950744	0.128021	none
AL451042.1	2.64919	0.120405	0.104985	1.14687	0.251435	0.30393	none
ARHGEF19-AS1	0
ARHGEF19	1554.11	-0.0892805	0.0530835	-1.68189	0.0925902	0.125048	none
ANO7L1	96.8988	0.0581997	0.0496746	1.17162	0.241351	0.293219	none
AL109627.1	469.263	0.40911	0.034523	11.8503	2.14312e-32	6.91507e-31	none
CPLANE2	214.272	0.602205	0.0384802	15.6497	3.33721e-55	1.06968e-52	none
MT1XP1	5.55864	-0.391418	0.0926726	-4.22366	2.40368e-05	5.69236e-05	none
FBXO42	1900.68	0.128223	0.0187312	6.84544	7.624e-12	3.67174e-11	none
SZRD1	5435.77	0.0408904	0.0245533	1.66537	0.0958388	0.128922	none
RPL22P3	5.78893	-0.454056	0.0786185	-5.77543	7.67569e-09	2.71665e-08	none
SPATA21	2.67338	-1.01539	0.137331	-7.39374	1.42759e-13	8.07953e-13	down
NECAP2	3756.94	0.0357892	0.0265043	1.35032	0.176915	0.223005	none
LINC01772	67.449	0.00617197	0.0505082	0.122197	0.902743	0.917938	none
CROCCP3	172.932	0.286626	0.0507731	5.64524	1.64955e-08	5.62543e-08	none
RNU1-1	0.501174	-1.69943	0.43917	-3.86964	0.000108997	0.000236586	down
AL137802.2	3.22613	0.0706218	0.0977501	0.722473	0.470004	0.524283	none
AL137802.3	0.309725	0.0358916	0.2192	0.163739	0.869937	0.890136	none
AL137802.1	0.00870932	-0.101512	2.31497	-0.0438504	0.965024		none
LINC01783	6.442	0.419222	0.141427	2.96424	0.00303436	0.00537568	none
RNU1-6P	0.00254716	-0.111913	2.88795	-0.0387518	0.969088		none
AL355149.1	0.149733	-0.35044	0.363722	-0.963483	0.335305		none
NBPF1	1238.94	0.332847	0.0540954	6.15296	7.60504e-10	2.98958e-09	none
AL137798.1	4.14513	-0.509396	0.122077	-4.17276	3.00937e-05	7.03348e-05	none
CROCCP2	935.058	0.159662	0.049105	3.25145	0.0011482	0.00216528	none
AL137798.3	0
MST1P2	95.6096	0.192913	0.0800144	2.41098	0.0159096	0.0250592	none
AL137798.2	0.172231	-0.110988	0.299899	-0.370084	0.71132		none
RNU1-3	0.270079	-0.689076	1.44208	-0.477836	0.632767	0.677918	none
AL021920.2	3.30089	-0.44063	0.172668	-2.55189	0.010714	0.0173834	none
EIF1AXP1	14.7572	-0.0997323	0.0559837	-1.78145	0.0748389	0.10321	none
ESPNP	12.511	0.0407924	0.12191	0.334611	0.737918	0.773782	none
AL021920.1	0.272485	-0.448184	0.265759	-1.68643	0.0917124	0.124015	none
AL021920.3	0.0635432	-0.163418	0.558666	-0.292515	0.769893		none
CROCC	1439.19	0.340171	0.0534317	6.36647	1.93428e-10	8.08227e-10	none
CROCCP4	0.0462844	-0.0960846	0.657118	-0.146221	0.883747		none
RNU1-4	0.119329	-0.344904	1.12279	-0.307184	0.758703		none
MST1L	32.6752	-0.000318701	0.0937247	-0.00340039	0.997287	0.997799	none
BX284668.1	0.0859471	-0.220401	0.678748	-0.324717	0.745395		none
BX284668.3	0.395683	-0.0138053	0.284568	-0.0485132	0.961307	0.967003	none
MIR3675	0.00581098	-0.117094	2.88795	-0.0405455	0.967658		none
BX284668.2	18.271	0.233477	0.131502	1.77547	0.075821	0.104427	none
RNU1-5P	0
BX284668.5	34.7295	-0.105678	0.0773231	-1.36671	0.171715	0.217233	none
BX284668.4	0
RNU1-2	0.954678	-2.4355	0.382532	-6.3668	1.93009e-10	8.06629e-10	down
BX284668.6	3.68458	-0.457636	0.089292	-5.12517	2.97277e-07	8.8781e-07	none
MFAP2	1740.62	-0.112398	0.0699787	-1.60617	0.108236	0.143714	none
AL049569.2	0.113161	-0.344957	0.403333	-0.855267	0.392403		none
AL049569.1	2.06034	-0.0408667	0.117537	-0.347691	0.728072	0.765023	none
ATP13A2	4402.17	0.419684	0.0412084	10.1844	2.32722e-24	3.49302e-23	none
AL049569.3	0
SDHB	3721.68	-0.0694159	0.0289542	-2.39744	0.0165103	0.0259452	none
PADI2	5783.03	-0.889209	0.106705	-8.33331	7.86117e-17	6.05572e-16	none
LINC02783	1.50897	-0.475884	0.186456	-2.55226	0.0107028	0.017367	none
AL590644.2	0.0315953	-0.225825	1.39728	-0.161618	0.871607		none
PADI1	9.78381	-0.527708	0.143684	-3.67269	0.000240012	0.000497312	none
PADI3	92.9706	-0.729619	0.159798	-4.56588	4.97401e-06	1.28361e-05	none
MIR3972	0.205623	-0.384858	0.453248	-0.84911	0.39582	0.451384	none
PADI4	6.86499	-0.0372798	0.115514	-0.322729	0.746901	0.78206	none
PADI6	2.27013	-0.441099	0.125499	-3.51477	0.000440133	0.000880149	none
RCC2-AS1	0
RCC2	10653.2	-0.151375	0.0333465	-4.53945	5.64011e-06	1.44627e-05	none
ARHGEF10L	2839.84	0.171482	0.0405589	4.22798	2.35795e-05	5.59028e-05	none
LINC02810	0.190909	-0.251771	0.321478	-0.783168	0.433529		none
ACTL8	185.172	-1.78888	0.191344	-9.34901	8.84745e-21	9.58253e-20	down
AL357509.1	0.107791	-0.137415	0.757835	-0.181325	0.856112		none
LINC01654	0.12965	-0.355268	0.734031	-0.483996	0.628389		none
IGSF21	728.508	0.427451	0.110634	3.86367	0.000111698	0.000242156	none
AL365209.1	13.6919	-0.548054	0.130132	-4.21152	2.53654e-05	5.98833e-05	none
IGSF21-AS1	0.384838	-0.802366	0.37898	-2.11718	0.034245	0.0506164	none
AL591896.1	0.0819828	-0.00782496	0.604632	-0.0129417	0.989674		none
KLHDC7A	1460.33	1.16243	0.148864	7.80866	5.7799e-15	3.738e-14	up
DYNLL1P3	0.155913	-0.168117	0.259689	-0.647377	0.517388		none
AL031737.1	0.630634	-0.19457	0.226202	-0.860159	0.389701	0.44537	none
PAX7	118.005	-0.275752	0.239586	-1.15095	0.249752	0.30214	none
TAS1R2	0.406618	0.00177498	0.206034	0.00861499	0.993126	0.99428	none
ALDH4A1	2502.64	0.246297	0.0597042	4.12529	3.70262e-05	8.55646e-05	none
MIR4695	0.00525148	-0.111894	2.82573	-0.0395984	0.968413		none
MIR1290	0.185229	-0.0177816	0.337116	-0.0527463	0.957934		none
IFFO2	1949.13	0.110796	0.0616578	1.79696	0.0723425	0.100106	none
AL137127.1	22.7209	-0.0500191	0.0502212	-0.995977	0.319261	0.374205	none
UBR4	10119.1	0.206294	0.0374688	5.50576	3.67578e-08	1.21133e-07	none
EMC1-AS1	12.2043	0.238405	0.0530461	4.49429	6.98016e-06	1.76874e-05	none
EMC1	4454.54	0.074475	0.0290274	2.56568	0.0102974	0.0167621	none
MRTO4	2757.34	-0.232991	0.0357594	-6.51552	7.24401e-11	3.16157e-10	none
AL035413.2	34.587	0.450581	0.0583918	7.7165	1.19569e-14	7.50536e-14	none
AKR7L	111.903	0.323752	0.0803588	4.02883	5.60545e-05	0.000126683	none
AKR7A3	1642.59	0.782287	0.119824	6.52861	6.63813e-11	2.90819e-10	none
AL035413.1	100.066	0.492176	0.058044	8.47936	2.26431e-17	1.83545e-16	none
AKR7A2	3246.59	0.296873	0.0392961	7.55477	4.19616e-14	2.4952e-13	none
RNU6-1099P	3.76956	-0.399407	0.0912878	-4.37525	1.21291e-05	2.9775e-05	none
SLC66A1	1004.14	0.0837254	0.0370883	2.25746	0.0239793	0.0366044	none
CAPZB	15296.6	0.0212778	0.0274804	0.774289	0.43876	0.49388	none
RN7SL277P	1.65799	-1.48423	0.199317	-7.44656	9.58031e-14	5.51111e-13	down
MICOS10	507.222	0.34987	0.0425589	8.22084	2.02084e-16	1.5e-15	none
RNU4-28P	0.20033	-0.382479	0.406733	-0.940369	0.347028	0.402389	none
AL031727.2	0.624845	0.459367	0.149349	3.07579	0.00209947	0.00380917	none
NBL1	9740.09	0.374169	0.0686448	5.4508	5.01431e-08	1.62812e-07	none
MICOS10-NBL1	0.13779	-0.0646489	0.418946	-0.154313	0.877363		none
AL031727.1	49.9271	-0.411259	0.0594325	-6.91977	4.52363e-12	2.22718e-11	none
HTR6	25.4755	-1.11609	0.115024	-9.70307	2.92564e-22	3.62815e-21	down
TMCO4	1781.83	0.15598	0.0389734	4.00221	6.27524e-05	0.000140748	none
RNF186	5.24617	0.347685	0.177915	1.95423	0.0506746	0.0723636	none
AL391883.1	0.434404	-0.271862	0.231707	-1.1733	0.240677	0.292488	none
OTUD3	787.934	0.0346868	0.0398184	0.871125	0.383686	0.439347	none
PLA2G2E	0.139757	-0.241135	0.400752	-0.601708	0.547369		none
RN7SL304P	0.101187	-0.194388	0.48404	-0.401594	0.687983		none
PLA2G2A	671.759	-0.271264	0.145647	-1.86247	0.0625364	0.0877068	none
PLA2G5	66.6118	-0.134001	0.083669	-1.60156	0.109253	0.144913	none
PLA2G2D	344.43	-1.11675	0.13601	-8.21077	2.19767e-16	1.6248e-15	down
PLA2G2F	5.01516	-0.356513	0.166661	-2.13915	0.0324232	0.0481635	none
Z98257.1	27.0079	-0.675465	0.130961	-5.15776	2.49919e-07	7.53454e-07	none
PLA2G2C	90.8484	0.517212	0.0939813	5.50335	3.72634e-08	1.22736e-07	none
UBXN10	1249.41	0.896547	0.0851884	10.5243	6.67635e-26	1.16428e-24	none
LINC01757	0.0630115	-0.137583	0.781369	-0.176079	0.860232		none
Z98257.2	0.13535	-0.225559	0.507039	-0.444855	0.656425		none
VWA5B1	6.30337	0.531807	0.130849	4.06428	4.818e-05	0.000109811	none
AL020998.1	0.257724	0.0020599	0.223268	0.00922612	0.992639	0.993903	none
LINC01141	7.35407	0.0124739	0.0742554	0.167987	0.866594	0.887404	none
AL139254.1	0.0538852	-0.220616	1.28316	-0.171932	0.863491		none
AL139254.2	0.182353	-0.251159	0.398794	-0.629796	0.528828		none
AL139254.3	0.051601	-0.137592	0.783403	-0.175634	0.860582		none
CAMK2N1	4600.42	0.398842	0.0704594	5.6606	1.50847e-08	5.16791e-08	none
MUL1	2156.33	0.328863	0.0239948	13.7056	9.40254e-43	8.83444e-41	none
RPS4XP4	0.4756	-0.221246	0.170605	-1.29683	0.194689	0.242721	none
FAM43B	60.4977	0.507702	0.0766796	6.62108	3.56595e-11	1.60686e-10	none
CDA	114.02	0.105441	0.0648157	1.62678	0.103783	0.1384	none
PINK1	795.225	0.864674	0.0278908	31.0021	5.04504e-211	1.13054e-206	none
MIR6084	0
PINK1-AS	224.851	0.106564	0.0374814	2.84313	0.0044673	0.00771514	none
DDOST	12872.1	-0.0556256	0.0314505	-1.76867	0.0769487	0.10582	none
KIF17	88.2319	0.250781	0.0532213	4.71204	2.45243e-06	6.56904e-06	none
AL663074.2	0.118282	-0.303362	0.548693	-0.552882	0.580344		none
SH2D5	13.8245	-0.225128	0.105625	-2.13139	0.0330574	0.0490146	none
AL663074.1	0.123814	-0.163245	0.413795	-0.394507	0.693207		none
HP1BP3	10505.7	0.230612	0.0292333	7.88867	3.05433e-15	2.02859e-14	none
EIF4G3	5541.07	0.291964	0.0319977	9.12455	7.20361e-20	7.2065e-19	none
RNU7-200P	0.135445	-0.298205	0.525477	-0.567494	0.570379		none
MIR1256	0.470488	-1.35502	0.473671	-2.86068	0.00422738	0.00732963	down
RPS15AP6	3.9155	-2.25723	0.153502	-14.7049	5.99804e-49	1.08395e-46	down
AL627311.1	0.944205	-2.50516	0.318742	-7.85953	3.85581e-15	2.53461e-14	down
HSPE1P27	2.02499	-2.6971	0.224503	-12.0137	3.01221e-33	1.06133e-31	down
AL031005.2	2.14338	0.0283655	0.0896886	0.316266	0.7518	0.786366	none
ECE1	15748.6	0.513607	0.0412736	12.444	1.50803e-35	6.70505e-34	none
AL031005.1	3.09963	-0.726279	0.142897	-5.08252	3.72455e-07	1.09806e-06	none
ECE1-AS1	16.9883	-0.710234	0.0772927	-9.18889	3.9693e-20	4.05231e-19	none
PPP1R11P1	0.479194	-0.570491	0.189602	-3.00889	0.00262201	0.00469414	none
AL592309.1	0.0928304	-0.173695	0.509687	-0.340787	0.733264		none
AL592309.2	0.0950786	-0.225544	0.622893	-0.36209	0.717284		none
NBPF2P	36.5443	0.394437	0.0622859	6.33269	2.40922e-10	9.97473e-10	none
HS6ST1P1	30.4763	0.695533	0.0886628	7.84471	4.33971e-15	2.84062e-14	none
CROCCP5	1.48713	0.434279	0.11222	3.86987	0.000108893	0.000236372	none
NBPF3	653.992	0.456694	0.0454329	10.052	8.99839e-24	1.28069e-22	none
PFN1P10	0.0223832	-0.0495754	1.16115	-0.0426949	0.965945		none
ALPL	1301.34	-0.0342492	0.0900175	-0.380473	0.703594	0.742651	none
LINC02596	0.370035	-0.0569172	0.229301	-0.24822	0.803964	0.832707	none
RAP1GAP	1884.28	0.297475	0.0666569	4.46277	8.09065e-06	2.03232e-05	none
USP48	3726.22	0.0922503	0.0247709	3.72414	0.000195981	0.000410808	none
AL590103.1	0.79446	-2.57284	0.348443	-7.38383	1.53804e-13	8.67067e-13	down
LDLRAD2	32.4534	0.617962	0.066474	9.29629	1.45427e-20	1.54302e-19	none
HSPG2	16756.1	0.708247	0.0572076	12.3803	3.34119e-35	1.4371e-33	none
AL590556.1	7.73205	-0.411977	0.0694405	-5.93281	2.97794e-09	1.09848e-08	none
AL590556.2	1.67579	-0.0346711	0.139417	-0.248687	0.803603	0.83239	none
CELA3B	0.161837	-0.287486	0.405672	-0.708667	0.478531		none
AL590556.3	0.0123866	-0.127413	2.1185	-0.0601427	0.952042		none
RN7SL386P	0.0770232	-0.453864	1.2058	-0.3764	0.70662		none
RNU6-1022P	0.00448201	-0.101544	2.88795	-0.0351611	0.971951		none
CELA3A	0.0896683	-0.00782534	0.845829	-0.00925169	0.992618		none
RN7SL186P	0.067701	-0.293083	0.97767	-0.299777	0.764347		none
RNU6-776P	0.00694966	-0.0963448	2.88795	-0.033361	0.973387		none
LINC01635	1.55288	-0.129841	0.105613	-1.2294	0.21892	0.269164	none
LINC00339	59.7624	0.153309	0.0558623	2.74441	0.00606195	0.0102472	none
CDC42	16184.1	0.101526	0.024222	4.19146	2.7717e-05	6.51367e-05	none
CDC42-AS1	26.5359	-0.019236	0.0531312	-0.362046	0.717318	0.755162	none
AL031281.1	0
CDC42-IT1	4.49968	-1.34793	0.128976	-10.451	1.45049e-25	2.45314e-24	down
MPHOSPH6P1	3.8458	-1.24067	0.135388	-9.16378	5.01103e-20	5.0765e-19	down
WNT4	672.537	0.53208	0.0897085	5.93121	3.00704e-09	1.10848e-08	none
AL445253.1	42.4218	0.163278	0.0828172	1.97155	0.0486608	0.0697457	none
MIR4418	0.0225162	-0.106633	1.4101	-0.0756211	0.939721		none
PPIAP34	2.85924	-0.593184	0.0922259	-6.43185	1.26057e-10	5.36882e-10	none
AL591122.1	0.096437	-0.21005	0.686986	-0.305755	0.759791		none
ZBTB40	2308.86	0.400835	0.0319509	12.5453	4.2164e-36	2.00161e-34	none
ZBTB40-IT1	5.09192	0.0687387	0.0855192	0.803781	0.421524	0.476682	none
EPHA8	71.3599	0.106607	0.147948	0.720568	0.471175	0.525458	none
MIR6127	0.0280062	-0.127335	1.09245	-0.116559	0.907209		none
C1QA	6081.15	-0.20723	0.070295	-2.948	0.00319838	0.00564706	none
C1QC	6417.57	-0.127862	0.0636975	-2.00734	0.0447137	0.0645458	none
C1QB	7167.9	-0.187752	0.0686558	-2.73468	0.00624411	0.0105381	none
EPHB2	849.546	-0.176993	0.0615479	-2.87569	0.00403144	0.00701238	none
MIR4684	0.144765	-0.44351	0.889355	-0.498687	0.618		none
AL512444.1	0.418524	-1.22096	0.410956	-2.97102	0.00296813	0.00526729	down
MIR4253	0.0176457	-0.137782	2.07411	-0.0664296	0.947036		none
LACTBL1	0.167909	-0.21526	0.391395	-0.549982	0.582332		none
TEX46	2.32492	-0.573975	0.104453	-5.49506	3.9057e-08	1.28323e-07	none
KDM1A	6428.81	-0.166125	0.0298996	-5.55609	2.75891e-08	9.20693e-08	none
AL031428.1	0.997433	-2.32672	0.29304	-7.93992	2.02311e-15	1.36739e-14	down
MIR3115	0.116208	-0.370837	0.677839	-0.547087	0.584319		none
AL031428.2	0.425171	-0.899654	0.302435	-2.9747	0.00293275	0.00520966	none
LUZP1	2399.87	0.247247	0.0352693	7.01026	2.37875e-12	1.20192e-11	none
AL161672.1	1.06857	-1.7303	0.225999	-7.65625	1.91438e-14	1.17726e-13	down
RNU6-514P	0.276858	-0.590375	0.453164	-1.30278	0.192648	0.240538	none
RNU6-135P	0.479258	-1.29428	0.392756	-3.29538	0.000982893	0.00187015	down
HTR1D	76.9284	0.0742938	0.105861	0.701807	0.482799	0.536327	none
AL109936.1	1.34028	-0.116147	0.108399	-1.07147	0.283956	0.338067	none
LINC01355	485.604	-0.180399	0.0550134	-3.27919	0.00104105	0.00197435	none
AL109936.9	19.3198	-0.558535	0.0709024	-7.87752	3.33933e-15	2.20806e-14	none
HNRNPR	9744	0.0617295	0.0210974	2.92594	0.00343422	0.00603825	none
ZNF436	2593.34	0.264836	0.0351324	7.53822	4.76422e-14	2.8141e-13	none
ZNF436-AS1	99.7267	0.0296981	0.0563977	0.526583	0.598483	0.646099	none
AL109936.2	41.241	-0.108926	0.075361	-1.44539	0.148347	0.190828	none
TCEA3	4352.63	0.18983	0.0572514	3.31574	0.000914024	0.00174802	none
AL357134.1	2.79506	-0.871561	0.137311	-6.34735	2.19053e-10	9.1046e-10	none
ASAP3	2976.44	0.200492	0.040764	4.91837	8.7267e-07	2.4606e-06	none
E2F2	664.272	-0.577528	0.0732997	-7.879	3.30016e-15	2.1828e-14	none
AL021154.1	7.87793	-0.290216	0.0900486	-3.22288	0.00126907	0.00237818	none
ID3	2097.01	0.117591	0.0558201	2.10661	0.0351511	0.0518453	none
AL450043.1	1.5964	-0.149957	0.107579	-1.39393	0.16334	0.207971	none
MDS2	6.02173	-0.56404	0.104153	-5.4155	6.11191e-08	1.96601e-07	none
AL451000.1	0.191525	-0.298915	0.357269	-0.836666	0.40278		none
RPL11	41771.3	-0.152768	0.0413143	-3.6977	0.000217564	0.000453485	none
ELOA-AS1	40.1421	-0.218522	0.0491617	-4.44498	8.79018e-06	2.19794e-05	none
ELOA	3319.06	-0.013365	0.0249762	-0.53511	0.592574	0.640492	none
PITHD1	2802.36	-0.10144	0.028742	-3.52932	0.000416629	0.000836394	none
LYPLA2	4096.21	-0.0879305	0.0379788	-2.31525	0.0205991	0.0318173	none
GALE	2384.61	-0.183629	0.053904	-3.40659	0.000657789	0.00128345	none
HMGCL	2468.31	0.255738	0.0371631	6.88151	5.92218e-12	2.88406e-11	none
FUCA1	3442.66	0.299359	0.0424273	7.05581	1.71595e-12	8.77317e-12	none
CNR2	37.4699	-0.393113	0.125913	-3.12209	0.00179571	0.00329055	none
BTBD6P1	2.51447	-0.302413	0.124183	-2.43521	0.0148831	0.0235733	none
AL590609.2	0.165661	-0.241315	0.308235	-0.782893	0.43369		none
MIR378F	0.0117621	-0.132592	1.89123	-0.0701087	0.944107		none
H3P1	2.1386	-0.323088	0.0871224	-3.70845	0.000208536	0.000435556	none
PNRC2	5179.81	0.154101	0.0294307	5.23604	1.64059e-07	5.05103e-07	none
SRSF10	6329.06	-0.094815	0.0208157	-4.55497	5.23935e-06	1.34867e-05	none
AL590609.1	0.109986	-0.189128	0.408363	-0.463136	0.643267		none
AL591178.1	1.51676	-0.274612	0.12533	-2.19112	0.0284433	0.0427445	none
MYOM3	87.0989	0.607201	0.0714193	8.50191	1.86494e-17	1.52218e-16	none
MYOM3-AS1	0.0679053	-0.0389996	0.628024	-0.0620989	0.950484		none
IL22RA1	64.1694	0.130137	0.094767	1.37323	0.169681	0.214946	none
IFNLR1	381.153	0.158153	0.0566497	2.79177	0.00524204	0.00896435	none
LINC02800	0.970919	-0.340662	0.146256	-2.32922	0.0198476	0.030746	none
GRHL3-AS1	4.17683	-0.0595938	0.104233	-0.571737	0.5675	0.61732	none
GRHL3	278.684	-0.163669	0.08648	-1.89256	0.0584161	0.0823818	none
STPG1	672.124	0.121776	0.0313421	3.88538	0.00010217	0.000222749	none
NIPAL3	2843.99	0.303368	0.0453863	6.68414	2.3229e-11	1.06744e-10	none
RCAN3AS	9.13972	-0.383091	0.0716938	-5.34344	9.11978e-08	2.88183e-07	none
RCAN3	2038.13	-0.044383	0.0416186	-1.06642	0.286233	0.340447	none
NCMAP-DT	1.26762	-0.196817	0.191225	-1.02924	0.303366	0.35807	none
NCMAP	297.847	-0.286098	0.127738	-2.23973	0.0251087	0.0381685	none
AL445686.1	0.97951	-1.14095	0.247662	-4.60688	4.08753e-06	1.06527e-05	down
SRRM1	5325.71	0.0019753	0.0254745	0.0775404	0.938194	0.947496	none
AL445648.1	0.585528	-0.571259	0.193178	-2.95717	0.00310479	0.00549308	none
CLIC4	13982.1	0.0134805	0.0451198	0.298772	0.765114	0.798337	none
RNU6-1208P	0.362638	-1.11274	0.46722	-2.38162	0.0172368	0.0270017	down
RUNX3	1193.34	-0.446153	0.0790317	-5.64524	1.64953e-08	5.62543e-08	none
MIR6731	0.132279	-0.344843	0.488042	-0.706584	0.479825		none
RUNX3-AS1	6.74087	-0.458593	0.10392	-4.41294	1.01976e-05	2.52798e-05	none
AL445471.1	0.747686	-1.24008	0.206078	-6.01754	1.77085e-09	6.69652e-09	down
MIR4425	0.0174224	-0.106663	1.9575	-0.0544894	0.956545		none
LINC02793	0.342478	-0.625749	0.23551	-2.65699	0.0078841	0.0130919	none
AL050344.1	0.388945	-0.37035	0.223197	-1.6593	0.0970563	0.130392	none
IFITM3P7	0.678509	-0.651251	0.158231	-4.11583	3.8579e-05	8.89603e-05	none
AL031432.1	0.383491	-0.49316	0.191413	-2.57641	0.00998313	0.0162996	none
SYF2	3099.67	0.0466458	0.0246506	1.89228	0.0584541	0.082425	none
AL031432.4	25.4539	-0.103214	0.0579197	-1.78202	0.0747464	0.103105	none
AL031432.5	3.73144	0.0533517	0.0780777	0.683316	0.494407	0.547493	none
RSRP1	2209.62	-0.0420749	0.0463046	-0.908656	0.363532	0.419225	none
AL031432.3	7.84171	-0.253701	0.0700036	-3.62411	0.000289961	0.000594976	none
AL031432.2	10.8808	0.0705625	0.103429	0.68223	0.495094	0.54815	none
RHD	31.0395	-0.130143	0.0903874	-1.43983	0.149914	0.192617	none
SDHDP6	7.05295	0.141323	0.0857681	1.64773	0.0994072	0.133239	none
AL928711.1	2.30502	-0.196744	0.100661	-1.95452	0.0506402	0.0723218	none
TMEM50A	8088.49	-0.0211468	0.0245139	-0.862643	0.388334	0.443966	none
RHCE	81.422	-0.11215	0.0725919	-1.54493	0.122362	0.160498	none
AL031284.1	1.46467	-0.119711	0.0942847	-1.26968	0.204199	0.253208	none
MACO1	3668.69	0.0569278	0.0288744	1.97156	0.0486594	0.0697457	none
LDLRAP1	2728.92	0.205007	0.034827	5.88644	3.94601e-09	1.43852e-08	none
AL606491.1	9.60795	-0.142522	0.067233	-2.11982	0.0340215	0.0503177	none
MAN1C1	1224.69	0.596217	0.0596774	9.99066	1.67467e-23	2.32947e-22	none
AL031280.1	4.99252	-0.798995	0.103918	-7.68873	1.48606e-14	9.23489e-14	none
SELENON	6686.39	0.293882	0.02861	10.272	9.42252e-25	1.48071e-23	none
AL020996.2	0
AL020996.1	21.7667	0.180742	0.046726	3.86813	0.000109673	0.000237949	none
MTFR1L	1620.96	0.0528566	0.0271933	1.94374	0.0519269	0.0739705	none
AL020996.3	0
AUNIP	264.055	-0.702307	0.063297	-11.0954	1.32026e-28	3.00363e-27	none
AL033528.2	1.21889	0.00769372	0.102204	0.0752777	0.939994	0.948843	none
PAQR7	820.52	0.119146	0.0392919	3.03232	0.00242683	0.00436302	none
STMN1	12220.8	-0.754011	0.0585166	-12.8854	5.43753e-38	3.15673e-36	none
SNRPFP2	0.840877	-0.656106	0.147971	-4.43402	9.24905e-06	2.30701e-05	none
AL033528.1	0.773769	-0.567962	0.146703	-3.87152	0.000108157	0.000234889	none
MIR3917	0
PAFAH2	1635.67	0.311568	0.033376	9.33509	1.00903e-20	1.08708e-19	none
RNU6-110P	0.262151	-0.00850768	0.245584	-0.0346427	0.972365	0.976308	none
AL592064.1	0.0486641	-0.0598324	0.731076	-0.0818417	0.934773		none
AL592064.2	0.0240591	-0.148083	1.04083	-0.142274	0.886864		none
EXTL1	322.215	-0.30777	0.113174	-2.71943	0.00653939	0.0109954	none
SLC30A2	136.93	-0.122705	0.132841	-0.923695	0.355645	0.411157	none
AL391650.2	4.52547	-0.543156	0.202567	-2.68137	0.00733223	0.0122339	none
TRIM63	16.0325	0.880894	0.113098	7.7888	6.7649e-15	4.34369e-14	none
PDIK1L	1545.6	0.151864	0.0350728	4.32998	1.49124e-05	3.62403e-05	none
FAM110D	154.95	0.444826	0.0731063	6.08465	1.1675e-09	4.50339e-09	none
C1orf232	0.533612	-0.21671	0.200734	-1.07959	0.280326	0.334299	none
AL391650.1	7.40997	0.111486	0.0803329	1.38781	0.165196	0.210048	none
ZNF593	0
CNKSR1	1796.38	0.13317	0.0434001	3.06843	0.00215184	0.00389709	none
CATSPER4	1.82857	-0.262751	0.120436	-2.18166	0.0291349	0.0437018	none
ZPLD2P	11.9376	0.394421	0.120182	3.28187	0.00103121	0.00195627	none
AL355877.2	0.599078	-0.251617	0.141505	-1.77814	0.0753802	0.103894	none
CEP85	1474.92	0.0761909	0.0409764	1.85938	0.0629728	0.0882608	none
AL355877.1	2.46258	-0.390568	0.0903045	-4.32501	1.52526e-05	3.7033e-05	none
SH3BGRL3	6406.73	-0.352329	0.0437879	-8.04626	8.53595e-16	5.95338e-15	none
UBXN11	1531.79	0.110651	0.054634	2.02532	0.0428346	0.0620906	none
CD52	966.949	-0.492222	0.0871251	-5.6496	1.60822e-08	5.49115e-08	none
CRYBG2	201.338	-0.137817	0.0892378	-1.54438	0.122497	0.160655	none
AL451139.1	1.03331	-0.446726	0.140334	-3.18331	0.00145603	0.00270402	none
ZNF683	174.771	-0.511213	0.0963555	-5.30549	1.12372e-07	3.51698e-07	none
LIN28A	26.4708	-1.62428	0.222309	-7.30639	2.74405e-13	1.51363e-12	down
DHDDS	2367.94	0.156352	0.0235997	6.62517	3.4686e-11	1.56489e-10	none
AL513365.1	6.98024	-0.848716	0.0851708	-9.96488	2.17147e-23	2.98989e-22	none
DHDDS-AS1	18.3344	-0.410868	0.0732889	-5.60615	2.06883e-08	6.98934e-08	none
HMGN2	12196.7	-0.00764716	0.0319679	-0.239214	0.81094	0.838847	none
DPPA2P2	0.203055	-0.387662	0.303136	-1.27884	0.200954	0.249705	none
RPS6KA1	3525.33	0.0853796	0.0391621	2.18016	0.0292456	0.0438445	none
MIR1976	0.00632873	-0.111894	2.77978	-0.0402528	0.967892		none
RN7SL679P	0.17948	-0.589541	0.527048	-1.11857	0.263323		none
RNU7-29P	0.0130538	-0.153345	2.85814	-0.0536521	0.957212		none
AL627313.1	0.0110645	-0.127432	2.27817	-0.055936	0.955393		none
AL627082.2	0.0123305	-0.117064	2.6306	-0.0445008	0.964505		none
AL627082.1	0.0152202	-0.137791	2.09198	-0.0658664	0.947484		none
AL512408.1	57.8782	0.106849	0.0521476	2.04897	0.0404648	0.0589772	none
ARID1A	9077.2	0.26749	0.0295187	9.06173	1.28403e-19	1.25376e-18	none
PIGV	1332.91	0.261108	0.0350699	7.44536	9.66776e-14	5.55713e-13	none
RN7SL165P	1.09987	-0.320089	0.143051	-2.23758	0.0252482	0.0383611	none
AL034380.2	0.087575	-0.246302	0.539313	-0.456696	0.64789		none
ZDHHC18	2333.35	-0.222976	0.033195	-6.71715	1.8531e-11	8.60557e-11	none
SFN	3769.26	-0.476305	0.0835961	-5.69769	1.2144e-08	4.20869e-08	none
GPN2	1436.58	0.162102	0.023521	6.8918	5.5091e-12	2.69138e-11	none
AL034380.1	0
GPATCH3	740.347	0.0611354	0.0328582	1.86058	0.0628029	0.0880474	none
NUDC	6954.64	-0.096312	0.038813	-2.48144	0.0130853	0.0209285	none
NR0B2	2.67338	0.400979	0.179095	2.23892	0.0251612	0.0382366	none
KDF1	1337.47	-0.0160257	0.0398113	-0.402542	0.687285	0.728012	none
RPL12P13	3.84952	-0.117305	0.0722629	-1.62331	0.104523	0.139296	none
AL356390.1	2.25892	-0.060282	0.0988566	-0.609792	0.542	0.593384	none
OSTCP2	3.3399	-0.0569405	0.0714917	-0.796463	0.425763	0.48084	none
TRNP1	421.519	-0.192188	0.0695881	-2.7618	0.00574842	0.00975808	none
TENT5B	1086.07	0.42167	0.0789792	5.339	9.34585e-08	2.95036e-07	none
SLC9A1	5018.99	0.271946	0.0359426	7.5661	3.84599e-14	2.29428e-13	none
AL590640.2	1.4189	-0.379909	0.105729	-3.59324	0.000326591	0.000665173	none
CHCHD3P3	12.5368	-0.104386	0.0462298	-2.25797	0.0239475	0.0365621	none
NPM1P39	16.7308	-0.150268	0.0547075	-2.74676	0.0060188	0.01018	none
SNRPEP7	0.110749	-0.106184	0.398341	-0.266565	0.789804		none
AL590640.1	0.0873778	-0.116647	0.509959	-0.228738	0.819073		none
WDTC1	5434.89	0.374122	0.0267056	14.0091	1.371e-44	1.55558e-42	none
FO393419.3	5.3466	0.145291	0.071886	2.02113	0.0432665	0.0626593	none
TMEM222	2510.7	0.0870117	0.0334457	2.60158	0.00927959	0.0152269	none
RNU6-48P	1.04343	-0.03695	0.123788	-0.298495	0.765326	0.798537	none
ACTG1P20	20.27	0.0621245	0.0769446	0.807393	0.41944	0.474673	none
SYTL1	1798.18	0.114787	0.0603093	1.9033	0.0570012	0.0805639	none
MAP3K6	2165.58	0.178495	0.045939	3.88547	0.000102131	0.000222675	none
FCN3	85.5394	-0.364039	0.0663823	-5.48398	4.15872e-08	1.36217e-07	none
CD164L2	80.3315	0.00388464	0.103262	0.0376194	0.969991	0.974228	none
FO393419.1	0.168226	-0.293053	0.354768	-0.826041	0.408781		none
GPR3	55.1502	-0.401893	0.0747943	-5.3733	7.7307e-08	2.46006e-07	none
WASF2	10281.1	0.230306	0.0317107	7.26272	3.79384e-13	2.059e-12	none
FO393419.2	1.86917	-2.98656	0.259701	-11.5	1.31926e-30	3.6141e-29	down
BX293535.1	7.23921	0.347969	0.107858	3.22619	0.00125452	0.00235232	none
AHDC1	2397.94	0.297114	0.0377749	7.86537	3.68e-15	2.42153e-14	none
FGR	559.695	-0.0623859	0.0611896	-1.01955	0.307942	0.362735	none
AL031729.1	14.8158	-0.302883	0.0661953	-4.5756	4.74848e-06	1.22824e-05	none
LINC02574	3.86659	-0.591446	0.121179	-4.88078	1.05669e-06	2.95126e-06	none
IFI6	23192.8	-0.239822	0.0992751	-2.41573	0.0157038	0.0247551	none
AL445490.1	32.7481	-0.116947	0.112957	-1.03532	0.30052	0.355234	none
RNU6-949P	0.0268929	-0.163682	1.91407	-0.0855153	0.931852		none
CHMP1AP1	0.0511045	0.0283147	1.02975	0.0274967	0.978064		none
RNU6-424P	0.0169148	-0.122222	1.96044	-0.0623442	0.950289		none
AL020997.5	1.46562	-0.336817	0.118099	-2.85198	0.00434475	0.00751942	none
FAM76A	852.073	0.0151475	0.0245893	0.616019	0.537882	0.589553	none
AL020997.1	4.25011	-0.422357	0.0708532	-5.96101	2.50685e-09	9.32151e-09	none
RPEP3	0.926203	-1.61862	0.219363	-7.37874	1.59797e-13	8.99268e-13	down
STX12	3484.61	0.146399	0.023703	6.17637	6.5591e-10	2.59687e-09	none
AL020997.2	2.47984	-1.5479	0.140135	-11.0457	2.29923e-28	5.08371e-27	down
AL020997.3	5.18528	-0.290087	0.0709777	-4.08702	4.36944e-05	0.000100158	none
RNU6-1245P	0.0956795	-0.194425	0.482049	-0.40333	0.686705		none
AL020997.4	0.631282	-1.15904	0.191775	-6.04377	1.50555e-09	5.73872e-09	down
PPP1R8	2772.56	-0.0896984	0.0210922	-4.25268	2.11231e-05	5.03963e-05	none
SCARNA1	3.69949	-3.40214	0.242321	-14.0398	8.89572e-45	1.02491e-42	down
THEMIS2	1244.92	-0.283361	0.0615732	-4.60202	4.18421e-06	1.08933e-05	none
RPA2	2992.89	-0.0125276	0.0272686	-0.459413	0.645937	0.689884	none
SMPDL3B	674.38	-0.0400346	0.060778	-0.658702	0.510087	0.562873	none
AL512288.1	1.77653	0.0502879	0.103478	0.485975	0.626985	0.672383	none
XKR8	631.613	0.0852242	0.029343	2.90441	0.0036794	0.00644104	none
EYA3	2174.64	0.125351	0.0317564	3.94725	7.90535e-05	0.00017499	none
AL512288.2	4.43024	-0.530452	0.0864872	-6.1333	8.60731e-10	3.36616e-09	none
RN7SL559P	2.04509	-1.04966	0.167854	-6.25341	4.01589e-10	1.62485e-09	down
SPCS2P4	69.331	-0.0141494	0.0548935	-0.257761	0.796592	0.826122	none
AL137792.2	0.0786605	-0.127138	0.636366	-0.199787	0.841647		none
AL137792.1	0.472759	-0.193133	0.148847	-1.29753	0.19445	0.242456	none
RNU6-176P	0.189356	-0.0797902	0.277304	-0.287736	0.773549		none
PTAFR	1115.85	-0.0108147	0.0606742	-0.178242	0.858533	0.880439	none
DNAJC8	5106.42	-0.10947	0.0229408	-4.77186	1.82533e-06	4.96165e-06	none
ATP5IF1	4589.92	-0.0977465	0.0422926	-2.31119	0.0208221	0.032143	none
AL353622.1	124.31	-0.1755	0.0747121	-2.34902	0.0188228	0.0292977	none
AL353622.2	2.69063	0.0184711	0.0992458	0.186115	0.852355	0.875102	none
SESN2	1206.17	0.247472	0.0386797	6.39798	1.57449e-10	6.6396e-10	none
MED18	912.896	0.0242675	0.0287541	0.843966	0.398688	0.454216	none
PHACTR4	3650.61	0.0682694	0.0271375	2.51568	0.0118803	0.0191247	none
CR391992.1	1.46449	-2.1211	0.203314	-10.4327	1.75885e-25	2.95901e-24	down
RNU6ATAC27P	1.19292	-0.724869	0.145414	-4.98485	6.20114e-07	1.7827e-06	none
RCC1	3459.26	-0.338544	0.043135	-7.84847	4.2115e-15	2.75911e-14	none
SNHG3	1144.07	-0.614382	0.0604454	-10.1642	2.86319e-24	4.25897e-23	none
SNORA73A	0
SNORA73B	382.676	-4.64883	0.146705	-31.6882	2.25837e-220	1.01216e-215	down
PRDX3P2	4.70176	-0.517448	0.09319	-5.55261	2.81428e-08	9.38122e-08	none
AL513497.1	62.3245	-0.435047	0.0623324	-6.97947	2.96304e-12	1.48327e-11	none
TRNAU1AP	983.074	-0.165255	0.0306218	-5.39665	6.78966e-08	2.17465e-07	none
SNHG12	556.997	-0.520848	0.0565459	-9.21107	3.22901e-20	3.31693e-19	none
SNORD99	15.0021	-0.97008	0.0722525	-13.4262	4.24437e-41	3.45234e-39	none
SNORA61	0
SNORA44	0
SNORA16A	0
TAF12	1409.58	-0.163385	0.0282403	-5.78554	7.22791e-09	2.56465e-08	none
RAB42	291.363	-0.248506	0.0559401	-4.44236	8.89791e-06	2.22314e-05	none
LINC01715	15.5762	-0.190518	0.0556164	-3.42557	0.000613503	0.00120196	none
AL360012.1	0
RNU11	0.0942054	-0.376019	0.814024	-0.461927	0.644134		none
GMEB1	1278.33	-0.0334927	0.022358	-1.49802	0.134129	0.174299	none
AL645729.1	0.359811	-0.440078	0.193534	-2.2739	0.0229719	0.0351829	none
YTHDF2	5778.39	-0.0479684	0.0228068	-2.10325	0.0354437	0.0522434	none
OPRD1	175.037	0.18517	0.125913	1.47062	0.141393	0.182784	none
AL009181.1	1.17406	0.132016	0.128927	1.02396	0.305856	0.360695	none
EPB41	3422.74	0.184507	0.0451834	4.08351	4.43598e-05	0.000101585	none
AL138785.1	6.84973	-0.329148	0.0679739	-4.84227	1.28367e-06	3.54979e-06	none
Metazoa_SRP	0.111707	-0.313768	0.421438	-0.744517	0.456564		none
TMEM200B	320.039	0.738033	0.0781126	9.44832	3.44299e-21	3.87708e-20	none
AL357500.1	0.838908	-1.26876	0.207787	-6.10607	1.02116e-09	3.96109e-09	down
SRSF4	5259.17	-0.00650317	0.0252563	-0.257487	0.796803	0.826302	none
AL357500.2	0
MECR	1183.87	-0.0742451	0.0329703	-2.25188	0.0243297	0.03709	none
AL590729.1	5.8767	-0.667583	0.0932205	-7.16134	7.98944e-13	4.21657e-12	none
PTPRU	2856.35	0.314508	0.0706332	4.45269	8.48005e-06	2.12513e-05	none
LINC01756	0.767953	-0.981999	0.223146	-4.40071	1.079e-05	2.66643e-05	none
AL671862.1	0.0464673	-0.039093	0.784462	-0.0498341	0.960255		none
AC092265.1	0.0881113	-0.282609	0.520796	-0.542648	0.587372		none
AL645944.2	0.305963	-0.221109	0.223775	-0.988086	0.323111	0.378099	none
AL645944.1	0.0193904	-0.0962835	1.84415	-0.0522103	0.958361		none
LINC01648	1.39601	0.180514	0.150138	1.20232	0.22924	0.280207	none
AL137076.1	0.131264	-0.0698944	0.47973	-0.145695	0.884162		none
AL021921.1	0.00912607	-0.132622	2.48421	-0.0533862	0.957424		none
AL161638.2	0.238906	0.395314	0.353076	1.11963	0.262872	0.316007	none
AL161638.1	0.0709539	-0.163362	0.691555	-0.236225	0.813258		none
MATN1	10.6335	-0.0409526	0.0687754	-0.595454	0.55154	0.602269	none
MATN1-AS1	85.1835	-0.105412	0.0486237	-2.16792	0.0301651	0.0450932	none
AL137857.1	0.775359	-0.786471	0.211881	-3.71185	0.000205752	0.000430102	none
LAPTM5	6618.41	-0.122819	0.0558388	-2.19953	0.0278405	0.0419159	none
MIR4420	0.916003	-0.342863	0.140612	-2.43836	0.0147543	0.0233841	none
AL137027.1	1.76747	0.452823	0.180173	2.51327	0.0119618	0.0192532	none
LINC01778	17.3503	0.0991314	0.0872665	1.13596	0.255973	0.308765	none
RN7SKP91	0.248897	-1.25653	0.949867	-1.32285	0.185886	0.233049	none
AL445235.1	0.177188	-0.365591	0.393956	-0.927999	0.353408		none
SDC3	6949.13	0.211603	0.0426784	4.95808	7.11945e-07	2.0308e-06	none
RN7SL371P	0.0608153	-0.0856868	0.578926	-0.14801	0.882335		none
PUM1	7046.09	0.115982	0.0240631	4.81992	1.43614e-06	3.94901e-06	none
AL356320.2	1.9136	-2.63459	0.216879	-12.1478	5.89535e-34	2.24294e-32	down
AL356320.1	1.46509	-2.58042	0.234334	-11.0117	3.35579e-28	7.2868e-27	down
SELENOWP1	0.38483	-0.249908	0.150569	-1.65975	0.0969638	0.130287	none
AC114495.1	0.821444	-0.251237	0.144627	-1.73713	0.0823634	0.112512	none
NKAIN1	2878.88	0.502125	0.124692	4.02693	5.65092e-05	0.000127659	none
SNRNP40	2648.35	-0.0680556	0.026295	-2.58816	0.00964906	0.0157967	none
AC114495.2	15.2477	-0.177395	0.0671566	-2.64151	0.00825371	0.013657	none
ZCCHC17	1767.79	-0.14583	0.0314454	-4.63756	3.52549e-06	9.2688e-06	none
AL451070.1	1.15124	-1.53494	0.177843	-8.63087	6.08881e-18	5.20382e-17	down
FABP3	509.425	-0.121783	0.0721993	-1.68676	0.0916498	0.123942	none
SERINC2	12337.1	-0.0149755	0.0576708	-0.259672	0.795117	0.824954	none
AC209007.1	5.62724	-0.146762	0.0758138	-1.93582	0.0528893	0.0752196	none
RNU6-40P	0.168592	-0.892018	0.899806	-0.991345	0.321517		none
LDC1P	6.58776	0.196404	0.148214	1.32513	0.185127	0.232202	none
LINC01226	24.2143	-0.374113	0.0975772	-3.83402	0.000126064	0.000271541	none
AC114488.1	10.0625	-0.344092	0.107797	-3.19203	0.00141275	0.00262921	none
TINAGL1	2005.41	-0.0138633	0.0768095	-0.18049	0.856768	0.878888	none
HCRTR1	5.12489	-0.240016	0.0912813	-2.62941	0.00855333	0.0141195	none
PEF1	4282.89	-0.0185567	0.0282667	-0.656487	0.511511	0.564152	none
PEF1-AS1	18.2136	-0.063576	0.0768711	-0.827047	0.408211	0.463627	none
AC114488.2	1.031	0.0989435	0.108789	0.909501	0.363086	0.418786	none
COL16A1	6483.39	0.447474	0.0672081	6.65804	2.77509e-11	1.26443e-10	none
ADGRB2	2133.19	0.925365	0.086824	10.6579	1.60102e-26	2.9786e-25	none
MIR4254	0.293118	0.283475	0.241413	1.17424	0.240301	0.292086	none
AL354919.2	1.75147	-0.138934	0.124949	-1.11193	0.266169	0.31944	none
SPOCD1	303.288	-0.12776	0.0919547	-1.38938	0.164718	0.209511	none
AL354919.1	2.1802	0.0775401	0.115797	0.669621	0.5031	0.556189	none
AL136115.2	12.6265	-0.45742	0.089688	-5.10012	3.39432e-07	1.00593e-06	none
PTP4A2	21269.9	0.147068	0.0419368	3.5069	0.000453368	0.000904556	none
AL136115.1	11.1627	-0.442767	0.111054	-3.98695	6.69276e-05	0.000149552	none
AL136115.3	0.445659	-0.715455	0.176447	-4.05478	5.01815e-05	0.000114112	none
KHDRBS1	11907.2	-0.122401	0.0173062	-7.07268	1.51965e-12	7.80427e-12	none
AL445248.1	7.76991	-0.970844	0.0954385	-10.1725	2.63166e-24	3.92966e-23	none
TMEM39B	862.62	-0.265561	0.0366033	-7.25511	4.01333e-13	2.17417e-12	none
MIR5585	0.234685	-0.354863	0.248045	-1.43064	0.152534	0.195596	none
KPNA6	5359.05	0.0687331	0.0308539	2.22769	0.025901	0.0392464	none
AL049795.2	0.199203	-0.277961	0.269995	-1.02951	0.303242	0.357951	none
TXLNA	6642.78	0.0198371	0.0256376	0.77375	0.439079	0.494214	none
CCDC28B	318.239	-0.288765	0.0574547	-5.02596	5.00912e-07	1.45646e-06	none
AL049795.1	3.87656	0.228215	0.0861051	2.65043	0.00803901	0.0133284	none
IQCC	303.897	-0.0180218	0.0396058	-0.45503	0.649088	0.692771	none
DCDC2B	17.5308	-0.589985	0.0940185	-6.27521	3.49172e-10	1.42136e-09	none
TMEM234	382.987	-0.236763	0.037462	-6.32007	2.6144e-10	1.07764e-09	none
EIF3I	12067	-0.166335	0.0318841	-5.21686	1.81978e-07	5.57285e-07	none
MTMR9LP	234.584	0.255626	0.0609855	4.1916	2.76999e-05	6.51067e-05	none
FAM167B	251.074	-0.121021	0.0542823	-2.22948	0.0257822	0.0390822	none
LCK	617.182	-0.417571	0.089797	-4.65016	3.31672e-06	8.7461e-06	none
HDAC1	7384.59	-0.0660076	0.0316079	-2.08833	0.0367682	0.0540147	none
MARCKSL1	22889.7	-0.24876	0.0435752	-5.70876	1.13801e-08	3.96019e-08	none
AL109945.1	2.51853	0.0057689	0.0926531	0.0622635	0.950353	0.957618	none
TSSK3	15.9191	0.0174853	0.0771138	0.226746	0.820621	0.84757	none
FAM229A	97.3894	-0.0648452	0.0653688	-0.99199	0.321202	0.376199	none
BSDC1	6649.64	0.189458	0.0252063	7.5163	5.63469e-14	3.3076e-13	none
GAPDHP20	1.15797	-0.522193	0.150824	-3.46226	0.000535654	0.0010593	none
AL356986.1	0.207892	-0.386858	0.434223	-0.890921	0.372971	0.428749	none
LRRC37A12P	0.956731	-0.595081	0.202452	-2.93937	0.00328878	0.0057978	none
RN7SL122P	0.233486	-0.989152	0.689387	-1.43483	0.151336	0.19426	none
AL033529.1	0.346601	-0.460883	0.174739	-2.63756	0.0083506	0.0138036	none
ZBTB8B	21.1185	-0.745804	0.137349	-5.43	5.63548e-08	1.81954e-07	none
ZBTB8A	598.038	0.0174903	0.0301136	0.58081	0.561368	0.611645	none
ZBTB8OS	1056.41	-0.341486	0.0294347	-11.6015	4.05032e-31	1.16663e-29	none
RBBP4	8353.47	0.0203963	0.0348841	0.584687	0.558758	0.609245	none
SYNC	216.908	0.857283	0.0586877	14.6075	2.51491e-48	4.17456e-46	none
AC114489.1	0.744812	-0.388988	0.176223	-2.20736	0.0272888	0.0411545	none
KIAA1522	14844	0.291711	0.0362986	8.03643	9.24908e-16	6.43274e-15	none
YARS1	5848.67	-0.233663	0.0361443	-6.46473	1.01483e-10	4.35825e-10	none
S100PBP	1770.23	-0.0450525	0.0257918	-1.74678	0.0806757	0.110475	none
FNDC5	117.474	0.20046	0.0763161	2.6267	0.00862175	0.014224	none
HPCA	25.4815	-0.0212706	0.0790945	-0.268926	0.787987	0.81877	none
TMEM54	2176.75	-0.300923	0.0530684	-5.67047	1.42403e-08	4.89435e-08	none
AL031602.2	12.4136	-0.160119	0.0558448	-2.86722	0.00414097	0.00718951	none
RNF19B	2305.3	0.0176116	0.0367644	0.47904	0.63191	0.677162	none
AL031602.1	6.77594	-0.709637	0.101648	-6.98134	2.92382e-12	1.46495e-11	none
AL355864.1	5.52965	-0.0134127	0.0845212	-0.158691	0.873912	0.893428	none
AL355864.2	2.60083	-0.498786	0.107644	-4.63365	3.59273e-06	9.43562e-06	none
AL020995.1	2.35509	-1.93562	0.170167	-11.3748	5.58243e-30	1.44872e-28	down
AK2	7793.34	-0.221072	0.0289485	-7.63671	2.22844e-14	1.36236e-13	none
AZIN2	639.873	0.313721	0.0427749	7.33423	2.23008e-13	1.24005e-12	none
AL662907.1	40.2797	-0.0173305	0.0532266	-0.325598	0.744729	0.780116	none
TRIM62	877.458	0.220682	0.0382604	5.76789	8.02687e-09	2.83512e-08	none
AL662907.2	25.5153	-0.0670356	0.0592257	-1.13187	0.25769	0.310603	none
AL662907.3	0.42939	-0.64198	0.235261	-2.7288	0.00635662	0.0107143	none
ZNF362	2371.49	-0.0162443	0.0307656	-0.528001	0.597499	0.645208	none
AL513327.2	12.4946	-0.386798	0.0821074	-4.71088	2.46653e-06	6.60403e-06	none
A3GALT2	2.56377	-0.45602	0.120696	-3.77825	0.000157937	0.000335056	none
AL513327.1	90.8007	-0.366799	0.0623084	-5.88684	3.93646e-09	1.43539e-08	none
PHC2	6572.66	0.0351032	0.0292181	1.20142	0.229588	0.280549	none
MIR3605	2.13097	-0.256935	0.10006	-2.5678	0.0102345	0.0166747	none
RN7SKP16	10.2616	-0.364246	0.0827661	-4.40091	1.07798e-05	2.66436e-05	none
PHC2-AS1	5.55236	-0.752824	0.0942279	-7.9894	1.35602e-15	9.30122e-15	none
TLR12P	1.50395	0.35996	0.107715	3.34179	0.000832394	0.0016014	none
ZSCAN20	266.428	0.171817	0.0456949	3.76009	0.000169854	0.000359014	none
AC115285.1	3.12777	-0.201868	0.0881471	-2.29012	0.0220141	0.0338258	none
CSMD2	234.996	-0.118431	0.0843691	-1.40372	0.160401	0.204589	none
HSPD1P14	0.206414	-0.548151	0.696752	-0.786723	0.431444	0.486574	none
HMGB4	0.400316	-1.06773	0.507376	-2.10442	0.0353416	0.0520981	none
CSMD2-AS1	0.489283	-1.31435	0.388518	-3.38297	0.000717052	0.00139193	down
RNA5SP42	0.0459465	-0.116909	1.0817	-0.108079	0.913933		none
C1orf94	5.46933	-1.77624	0.255209	-6.95994	3.40417e-12	1.69501e-11	down
AC115286.1	0.0105346	-0.106693	2.45826	-0.0434019	0.965381		none
AC099565.1	0.17012	-0.277301	0.465326	-0.595929	0.551223		none
MIR552	0.015213	-0.0392603	2.88795	-0.0135945	0.989153		none
SMIM12	1851.99	-0.0377648	0.0269811	-1.39968	0.16161	0.205961	none
GJB5	143.502	-0.553186	0.134896	-4.10084	4.11658e-05	9.46284e-05	none
GJB4	6.85398	-0.544558	0.157576	-3.45585	0.000548557	0.00108334	none
AL121988.1	0.231119	-0.155368	0.30167	-0.515027	0.606534	0.653186	none
GJB3	241.761	-0.762332	0.147962	-5.15223	2.57408e-07	7.7447e-07	none
GJA4	761.548	0.288693	0.055693	5.18365	2.17591e-07	6.60658e-07	none
AL122010.1	0
DLGAP3	64.9583	-0.138359	0.0991553	-1.39538	0.162903	0.207479	none
AC114490.3	44.3485	0.20966	0.0559682	3.74606	0.000179636	0.000378547	none
AC114490.1	16.0294	0.329775	0.0630031	5.23426	1.65646e-07	5.09606e-07	none
AC114490.2	0.0339809	-0.0702771	0.920099	-0.07638	0.939117		none
TMEM35B	0.617018	0.133594	0.133207	1.00291	0.315907	0.370694	none
ZMYM6	749.941	-0.0688925	0.0228589	-3.01382	0.0025798	0.00462189	none
ZMYM1	831.837	-0.0962962	0.0348483	-2.7633	0.00572205	0.00971736	none
RPL12P45	0.0652981	-0.262011	0.826083	-0.317172	0.751113		none
EFCAB14P1	0.503982	-0.0186686	0.140319	-0.133044	0.894158	0.910761	none
AL590434.1	3.40724	0.24366	0.119939	2.03154	0.0422007	0.0612762	none
SFPQ	18378.3	-0.195668	0.0186348	-10.5002	8.62215e-26	1.4897e-24	none
ZMYM4	5273.01	0.0192945	0.0293603	0.657164	0.511076	0.563797	none
RN7SL503P	1.13788	-3.12965	0.38012	-8.23332	1.82088e-16	1.35697e-15	down
SNORA62	0.0415234	-0.231051	1.28931	-0.179206	0.857776		none
RPL5P4	22.3557	-0.659455	0.0624553	-10.5588	4.62415e-26	8.20773e-25	none
ZMYM4-AS1	3.54551	-1.21077	0.122406	-9.89144	4.53441e-23	6.05733e-22	down
KIAA0319L	8065.55	0.388502	0.0377601	10.2887	7.92339e-25	1.25747e-23	none
AC004865.1	2.39169	-2.68417	0.228844	-11.7293	9.02313e-32	2.73983e-30	down
NCDN	3134.13	0.258235	0.0431498	5.98462	2.16889e-09	8.12551e-09	none
TFAP2E-AS1	14.4803	-0.21451	0.0679695	-3.15598	0.00159962	0.00295453	none
TFAP2E	75.2682	-0.530871	0.0719438	-7.37897	1.59519e-13	8.97818e-13	none
PSMB2	6769.22	-0.417666	0.0347535	-12.018	2.85935e-33	1.01225e-31	none
C1orf216	1415.91	0.14112	0.0281775	5.00826	5.49242e-07	1.58966e-06	none
CLSPN	712.243	-0.651946	0.0652234	-9.99559	1.5933e-23	2.22111e-22	none
AL354864.1	0.110513	-0.199175	0.381889	-0.521551	0.601983		none
AGO4	1767.65	0.114628	0.0332922	3.44309	0.000575101	0.00113246	none
AGO1	3639.78	-0.0148596	0.0298091	-0.498491	0.618138	0.664182	none
CFAP97P1	0.1963	-0.484654	0.373413	-1.2979	0.19432	0.242326	none
AL139286.2	2.65689	-1.54498	0.152909	-10.1039	5.30713e-24	7.71005e-23	down
AL139286.1	0
AGO3	1674.42	-0.116012	0.037475	-3.09572	0.00196336	0.00357801	none
AL138787.2	6.69257	-1.16375	0.0918655	-12.668	8.89362e-37	4.54498e-35	down
AL138787.1	6.45763	-0.0553265	0.10055	-0.550241	0.582154	0.630979	none
TEKT2	95.2862	0.10869	0.0982959	1.10574	0.268837	0.322305	none
ADPRS	2229.05	-0.176022	0.0349089	-5.04233	4.59891e-07	1.3425e-06	none
COL8A2	4135.58	0.341085	0.0743706	4.58629	4.51189e-06	1.17015e-05	none
TRAPPC3	3576.21	-0.145782	0.0270364	-5.39205	6.96592e-08	2.22792e-07	none
MAP7D1	5711.22	0.11735	0.0361682	3.24457	0.00117629	0.00221406	none
RN7SL131P	0.136649	-0.054261	0.342392	-0.158476	0.874081		none
THRAP3	11238.9	0.121421	0.0189575	6.40487	1.50497e-10	6.35778e-10	none
UBE2V2P4	1.52453	-2.86278	0.259746	-11.0214	3.01176e-28	6.57162e-27	down
SH3D21	1200.34	0.573126	0.0660755	8.67381	4.17912e-18	3.62072e-17	none
EVA1B	0
AL591845.1	648.818	1.19426	0.123428	9.67571	3.82413e-22	4.68919e-21	up
STK40	3550.5	0.0529891	0.0352335	1.50394	0.132597	0.172518	none
LSM10	1445.4	-0.252018	0.039729	-6.34343	2.24706e-10	9.32749e-10	none
RNU4-27P	0.0544749	-0.210237	0.975952	-0.215417	0.829442		none
OSCP1	799.917	0.277051	0.0456845	6.06445	1.32409e-09	5.07771e-09	none
SNORA63C	3.46576	-1.69401	0.1525	-11.1083	1.14322e-28	2.61279e-27	down
MRPS15	3723.75	-0.479711	0.0381127	-12.5866	2.50093e-36	1.22232e-34	none
CSF3R	1765.02	0.252163	0.0810407	3.11155	0.00186105	0.00340347	none
FTLP18	0.0300304	-0.142894	1.34875	-0.105946	0.915626		none
AL596257.1	0.880531	-0.317246	0.189246	-1.67637	0.0936661	0.126364	none
AC117945.2	1.15263	-1.49729	0.342088	-4.37691	1.20374e-05	2.9566e-05	down
AC117945.1	0.164509	-0.308902	0.400058	-0.772143	0.44003		none
GRIK3	1480.04	0.895862	0.120828	7.41436	1.22215e-13	6.96257e-13	none
AL031430.1	0.439942	-0.435534	0.305845	-1.42403	0.154436	0.197786	none
AL353604.1	0.613915	-0.127212	0.239321	-0.531552	0.595036	0.642906	none
MIR4255	0.0111685	-0.163723	2.65199	-0.061736	0.950773		none
RNU6-636P	0.019787	-0.194792	1.94491	-0.100155	0.920222		none
RNA5SP43	0.0272562	-0.080685	1.26476	-0.0637948	0.949134		none
RPS29P6	0.420255	0.567781	0.241316	2.35285	0.0186301	0.029019	none
LINC01137	412.144	0.131467	0.0473309	2.77761	0.00547603	0.00933174	none
ZC3H12A	1068.22	0.0109032	0.0590035	0.184789	0.853394	0.875993	none
MIR6732	0
MEAF6	6015.87	0.0650235	0.0325191	1.99955	0.0455493	0.065645	none
MIR5581	6.6665	0.222113	0.0891482	2.4915	0.0127204	0.0203783	none
SNIP1	1337.42	0.0765756	0.0219839	3.48326	0.000495345	0.000983623	none
FTH1P1	4.64743	-0.538895	0.0801445	-6.72405	1.76748e-11	8.22583e-11	none
AL034379.1	10.4843	-0.372745	0.0632491	-5.89328	3.78601e-09	1.38278e-08	none
DNALI1	2542.2	0.462561	0.0953897	4.84917	1.23979e-06	3.43417e-06	none
GNL2	4748.86	-0.366397	0.0298023	-12.2943	9.72428e-35	3.99105e-33	none
AL513220.1	1.6921	0.274137	0.15498	1.76886	0.0769176	0.105781	none
RSPO1	115.893	0.443689	0.113548	3.9075	9.32551e-05	0.000204477	none
C1orf109	1135.52	-0.0228034	0.0303733	-0.750771	0.452791	0.507456	none
CDCA8	1433.26	-0.923445	0.0630714	-14.6413	1.53187e-48	2.60059e-46	none
EPHA10	495.513	0.432179	0.0705545	6.12547	9.04188e-10	3.52904e-09	none
ACTN4P2	0.646396	-0.288453	0.181612	-1.58829	0.11222	0.14845	none
AL929472.1	0.294871	-0.2636	0.201502	-1.30818	0.190814	0.238434	none
MANEAL	557.924	0.00612225	0.066219	0.0924546	0.926337	0.937671	none
AL929472.3	0
YRDC	1023.87	-0.253204	0.0345081	-7.33753	2.17569e-13	1.21085e-12	none
C1orf122	2107.54	-0.221283	0.0511558	-4.32567	1.5207e-05	3.69282e-05	none
MTF1	1739.78	0.121159	0.0325897	3.71772	0.000201032	0.000420825	none
AL929472.4	0.537559	-1.09107	0.226449	-4.81817	1.44884e-06	3.98148e-06	down
AL929472.2	0
INPP5B	1031.56	0.0787753	0.0347358	2.26784	0.0233391	0.0356951	none
SNORA63	0.108609	-0.32928	0.602062	-0.546921	0.584433		none
RNU6-584P	1.10912	0.0580737	0.121206	0.479131	0.631846	0.677109	none
SF3A3	5323.51	-0.223197	0.0279032	-7.999	1.25434e-15	8.62885e-15	none
RNU6-510P	5.43935	-0.210739	0.069971	-3.0118	0.00259707	0.00465135	none
FHL3	1402.41	-0.263632	0.0459882	-5.73261	9.88988e-09	3.46393e-08	none
UTP11	1969.67	-0.399257	0.0294996	-13.5343	9.80698e-42	8.404e-40	none
POU3F1	41.1272	-0.49464	0.096652	-5.11774	3.09211e-07	9.21424e-07	none
MIR3659HG	6.22954	0.0132841	0.109855	0.120924	0.903751	0.918757	none
AL139158.1	0.150187	-0.381273	0.569823	-0.669109	0.503426		none
MIR3659	0.0476318	-0.173957	1.07991	-0.161084	0.872027		none
LINC02786	0.290804	-0.592814	0.320205	-1.85136	0.0641182	0.0897511	none
AL390839.1	0.207662	-0.482258	0.431189	-1.11844	0.263381	0.316543	none
AL390839.2	0.285484	-0.285064	0.275267	-1.03559	0.300393	0.355094	none
LINC01343	0.493047	-0.60914	0.234214	-2.60079	0.00930105	0.0152577	none
AL513479.1	0.0449465	-0.14799	0.813385	-0.181943	0.855627		none
RNU6-753P	0.0165348	-0.122233	2.22012	-0.0550569	0.956093		none
LINC01685	0.35801	-0.78303	0.267151	-2.93104	0.00337824	0.00594659	none
HSPA5P1	12.9471	-0.187405	0.0533571	-3.51228	0.00044428	0.000887728	none
AL354702.1	0.33331	-0.470403	0.399442	-1.17765	0.238935	0.290663	none
RRAGC	1481.81	-0.234253	0.0285629	-8.20132	2.37768e-16	1.75124e-15	none
AL139260.2	0
AL139260.1	25.3735	0.110855	0.0447226	2.47873	0.013185	0.0210774	none
MYCBP	1800.67	-0.0485518	0.0317893	-1.5273	0.126687	0.165656	none
AL139260.3	1.97042	-0.5006	0.100984	-4.95724	7.15009e-07	2.03889e-06	none
GJA9	1.04038	-0.264451	0.117909	-2.24284	0.0249071	0.0378878	none
RHBDL2	257.787	-0.453747	0.0667901	-6.79363	1.09344e-11	5.18308e-11	none
RNU6-605P	0.116078	-0.370908	0.421424	-0.880129	0.378789		none
EIF1P2	0.142054	-0.329435	0.416503	-0.790954	0.428971		none
AKIRIN1	3554.41	-0.0783625	0.0314701	-2.49007	0.0127719	0.0204549	none
NDUFS5	7326.44	-0.575419	0.045804	-12.5626	3.38842e-36	1.62615e-34	none
MACF1	19494.8	0.232246	0.0460594	5.04231	4.59944e-07	1.34257e-06	none
RNU6-608P	0.818904	-2.46165	0.376643	-6.53576	6.32858e-11	2.78073e-10	down
RNA5SP44	1.29934	-3.03704	0.32553	-9.32951	1.06364e-20	1.14372e-19	down
AL442071.2	2.15708	-2.18208	0.213321	-10.2291	1.46859e-24	2.25873e-23	down
AL442071.1	1.17585	-2.44814	0.262235	-9.33567	1.00353e-20	1.08194e-19	down
HSPE1P8	2.07997	-1.88349	0.151524	-12.4303	1.78917e-35	7.908e-34	down
BMP8A	686.87	0.152545	0.0627052	2.43273	0.0149853	0.0237198	none
OXCT2P1	8.63772	-0.0379261	0.0806573	-0.470213	0.638203	0.682893	none
PPIEL	175.515	-0.0428381	0.0684609	-0.625732	0.531491	0.583346	none
PABPC4	7292.68	-0.434642	0.0371223	-11.7084	1.15455e-31	3.46582e-30	none
PABPC4-AS1	12.8177	-0.627779	0.0839421	-7.47871	7.50537e-14	4.35494e-13	none
SNORA55	0
HEYL	1179.3	0.337344	0.0539742	6.2501	4.10184e-10	1.65902e-09	none
AL035404.2	0.547798	-0.948613	0.264599	-3.58509	0.000336956	0.00068504	none
NT5C1A	1.26739	-0.00370398	0.1392	-0.026609	0.978772	0.981641	none
HPCAL4	17.6534	-0.337272	0.100561	-3.3539	0.000796801	0.00153662	none
PPIE	2548.09	-0.186971	0.0313946	-5.95551	2.59267e-09	9.62464e-09	none
AL035404.1	0.322237	0.3324	0.202546	1.6411	0.100776	0.134883	none
RNU7-121P	0.0184212	-0.158544	2.88795	-0.0548985	0.956219		none
BMP8B	502.744	-0.322589	0.079905	-4.03716	5.41026e-05	0.000122537	none
OXCT2	10.1404	-0.632351	0.0906468	-6.97599	3.03733e-12	1.51843e-11	none
BMP8B-AS1	0.829156	-0.66776	0.173852	-3.84096	0.000122554	0.000264411	none
AL033527.2	5.55245	-0.751651	0.106804	-7.03764	1.95528e-12	9.95023e-12	none
AL033527.1	0.0453152	-0.251725	1.17563	-0.21412	0.830453		none
AL033527.3	8.66356	-0.964099	0.103929	-9.27654	1.75071e-20	1.84143e-19	none
LINC02811	0.879795	-0.504882	0.141875	-3.55864	0.000372782	0.000753295	none
TRIT1	1254.71	-0.378815	0.0327421	-11.5697	5.87131e-31	1.66393e-29	none
MYCL	598.435	-0.224993	0.0787049	-2.85869	0.00425398	0.00737143	none
MYCL-AS1	1.46753	-0.15368	0.111872	-1.37371	0.169532	0.214787	none
MFSD2A	611.923	-0.543939	0.0902585	-6.02646	1.6759e-09	6.35505e-09	none
AL663070.1	15.7793	-0.366141	0.0704772	-5.19516	2.04544e-07	6.22901e-07	none
CAP1	22531	-0.0550729	0.028762	-1.91478	0.0555207	0.0786318	none
PPT1	18085.4	0.0924371	0.0425995	2.16991	0.0300137	0.0448893	none
OAZ1P1	108.565	0.618496	0.20945	2.95295	0.00314756	0.00556127	none
RLF	1883.42	-0.144077	0.0363593	-3.96259	7.41422e-05	0.000164851	none
RNU6-1237P	0.571412	-1.6304	0.350599	-4.65032	3.31424e-06	8.74058e-06	down
TMCO2	1.1966	-0.607116	0.126039	-4.81687	1.45828e-06	4.00596e-06	none
AL050341.2	366.018	-0.0382673	0.0382178	-1.0013	0.316684	0.371519	none
ZMPSTE24	6173.59	0.0205295	0.0310425	0.661335	0.508398	0.561338	none
AL050341.1	0.772031	-0.748553	0.173263	-4.32033	1.55793e-05	3.77832e-05	none
COL9A2	1789.45	0.0699101	0.0926271	0.754748	0.4504	0.505106	none
AL031985.2	3.18831	-0.240813	0.0874579	-2.75347	0.00589668	0.00999158	none
SMAP2	3571.87	0.0131167	0.0352028	0.372605	0.709442	0.748048	none
AL031985.1	0.580404	-0.819349	0.186659	-4.38954	1.13589e-05	2.79884e-05	none
AL031985.4	1.81739	-1.22673	0.126111	-9.72743	2.30345e-22	2.88449e-21	down
ZFP69B	183.042	-0.372978	0.0510026	-7.31292	2.61406e-13	1.44406e-12	none
AL031985.3	268.246	-0.46356	0.0447581	-10.357	3.88956e-25	6.34361e-24	none
AL603839.4	13.9767	-0.601515	0.073688	-8.16299	3.26819e-16	2.37821e-15	none
ZFP69	365.642	-0.135038	0.033442	-4.03799	5.39119e-05	0.000122136	none
AL603839.3	28.3142	-0.350633	0.060465	-5.79895	6.67333e-09	2.37558e-08	none
EXO5	248.504	-0.210653	0.0343924	-6.12499	9.06892e-10	3.53928e-09	none
AL603839.1	0.0674323	-0.19449	0.508496	-0.382482	0.702104		none
AL603839.2	20.6854	-0.134967	0.0469789	-2.87292	0.00406693	0.00707028	none
ZNF684	176.467	-0.1034	0.0293479	-3.52325	0.000426289	0.000854255	none
AL356379.2	0.433911	-0.207208	0.174686	-1.18618	0.235552	0.287031	none
AL356379.1	0.158553	-0.168602	0.33726	-0.499916	0.617134		none
GTF2F2P2	0.101634	-0.241058	0.540725	-0.445805	0.655738		none
RIMS3	409.045	-0.14304	0.0728081	-1.96462	0.0494581	0.070792	none
AL031289.2	2.10283	-0.779292	0.113183	-6.88525	5.76867e-12	2.81267e-11	none
AL031289.1	4.50083	-0.0982786	0.0677493	-1.45062	0.146885	0.189099	none
NFYC-AS1	43.454	-0.216308	0.05342	-4.04919	5.13956e-05	0.000116713	none
NFYC	2970.49	-0.199944	0.0279813	-7.14562	8.95909e-13	4.70449e-12	none
MIR30E	0.2454	-0.797087	0.642213	-1.24116	0.214548	0.264383	none
MIR30C1	0.225991	-0.431679	0.342713	-1.25959	0.207817	0.257205	none
KCNQ4	190.555	-1.11069	0.104182	-10.6611	1.54819e-26	2.88272e-25	down
RN7SL326P	0.284154	-1.07846	0.47615	-2.26495	0.0235157	0.0359493	down
CITED4	3025.69	-0.506375	0.0954673	-5.30417	1.13188e-07	3.54152e-07	none
AC119677.1	0.581957	-0.91986	0.172811	-5.32292	1.02112e-07	3.21178e-07	none
AL391730.1	0.218251	-0.519076	0.292265	-1.77604	0.075726	0.104315	none
AL391730.2	1.75313	-0.856304	0.165127	-5.18574	2.15161e-07	6.53814e-07	none
UBE2V1P8	0.0339555	-0.111766	1.14947	-0.0972327	0.922542		none
CTPS1	2333.32	-0.627168	0.0505189	-12.4145	2.17974e-35	9.50307e-34	none
SLFNL1-AS1	47.7898	-0.639255	0.0640808	-9.97577	1.94588e-23	2.69251e-22	none
SLFNL1	31.3789	-0.75044	0.0746299	-10.0555	8.68934e-24	1.23907e-22	none
SCMH1	2477.78	-0.124458	0.0324288	-3.8379	0.000124093	0.000267578	none
RPL23AP17	2.0933	-3.18889	0.253586	-12.5752	2.89029e-36	1.39587e-34	down
AC093151.7	1.55613	-0.0810555	0.161348	-0.502364	0.615411	0.661538	none
AC093151.2	4.91338	-0.797841	0.100149	-7.96658	1.63132e-15	1.11164e-14	none
AC093151.1	0.247694	-0.435313	0.285652	-1.52393	0.127527	0.166643	none
AC093151.5	0.6309	-0.509484	0.19754	-2.57914	0.00990464	0.0161821	none
FOXO6	395.94	-0.169545	0.0626584	-2.70586	0.00681272	0.0114301	none
FOXO6-AS1	13.042	-0.181531	0.0847985	-2.14073	0.032296	0.0479921	none
RNA5SP45	0.0530938	-0.179081	0.957656	-0.186999	0.851661		none
EDN2	457.535	-0.31705	0.102472	-3.09401	0.00197471	0.00359737	none
HIVEP3	1850.53	0.367189	0.0433139	8.47739	2.30298e-17	1.86486e-16	none
AL445933.2	4.93697	-0.256656	0.132434	-1.93799	0.0526244	0.0748831	none
AL445933.1	151.352	-0.288559	0.0680636	-4.23955	2.23973e-05	5.32747e-05	none
AC119676.1	0
AL158216.1	0.879808	-0.253829	0.144776	-1.75325	0.0795585	0.109105	none
HNRNPFP1	0.185351	-0.0125148	0.245926	-0.0508886	0.959414		none
AC114492.1	0.0665875	-0.236119	1.04774	-0.225361	0.821698		none
GUCA2B	0.118893	-0.106093	0.631022	-0.16813	0.866481		none
GUCA2A	0.436838	-0.670399	0.197603	-3.39265	0.000692199	0.00134666	none
FOXJ3	4401.96	-0.0255121	0.028108	-0.907645	0.364066	0.419787	none
AC096540.1	14.8627	-0.237848	0.0551623	-4.31178	1.61948e-05	3.9189e-05	none
RIMKLA	389.678	-0.161964	0.0929826	-1.74187	0.0815315	0.111517	none
AL513331.1	0.641468	-0.225197	0.140641	-1.60122	0.109329	0.145006	none
ZMYND12	212.744	0.0284069	0.0609558	0.466025	0.641198	0.685574	none
PPCS	3928.09	-0.0728107	0.029432	-2.47386	0.0133661	0.0213402	none
CCDC30	535.033	0.210264	0.0542594	3.87517	0.000106551	0.000231669	none
RPS3AP11	0.889608	-0.495962	0.144066	-3.44261	0.000576138	0.00113431	none
TMSB4XP1	7.60161	-0.315229	0.067427	-4.67511	2.938e-06	7.79097e-06	none
RNU6-536P	0.398388	-0.751441	0.32767	-2.29329	0.0218313	0.0335714	none
AL445669.1	1.26986	-0.636611	0.127483	-4.99369	5.92374e-07	1.70766e-06	none
PPIH	1102.74	-0.504601	0.0344177	-14.6611	1.14403e-48	1.97853e-46	none
AC098484.4	84.9764	-0.155441	0.0536731	-2.89606	0.00377877	0.00660415	none
AC098484.2	3.71859	-0.519532	0.0779351	-6.66622	2.6247e-11	1.199e-10	none
YBX1	19689.9	-0.616361	0.0482193	-12.7824	2.05534e-37	1.12888e-35	none
CLDN19	43.1333	1.41165	0.144634	9.76012	1.66965e-22	2.11924e-21	up
P3H1	2890.84	-0.0881766	0.0483247	-1.82467	0.0680512	0.094718	none
C1orf50	142.56	0.213712	0.0399957	5.34337	9.12362e-08	2.88284e-07	none
AC098484.3	0.0925154	0.0181882	0.388305	0.0468401	0.962641		none
AC098484.1	0
TMEM269	31.7196	-0.434705	0.0567191	-7.66417	1.79992e-14	1.11053e-13	none
SVBP	554.441	-0.307628	0.0378806	-8.12098	4.6244e-16	3.31292e-15	none
ERMAP	712.969	0.165876	0.033133	5.00638	5.54633e-07	1.60423e-06	none
AL512353.1	67.8391	-0.449954	0.0545008	-8.25592	1.50733e-16	1.13254e-15	none
ZNF691	757.646	-0.167429	0.0288658	-5.80026	6.62108e-09	2.3581e-08	none
AL512353.2	1.12346	-1.05071	0.15426	-6.81132	9.67057e-12	4.6108e-11	down
MKRN8P	0.570033	-0.704147	0.186572	-3.77412	0.000160572	0.000340405	none
ATP6V1E1P1	0.975085	-0.122272	0.117088	-1.04427	0.296359	0.350963	none
SLC2A1	7345.78	-0.165037	0.0640178	-2.57799	0.00993775	0.0162302	none
ATP6V0CP4	2.16848	-1.33844	0.149508	-8.95229	3.48181e-19	3.27763e-18	down
SLC2A1-AS1	42.6672	-0.333151	0.0680405	-4.89637	9.76242e-07	2.73851e-06	none
AC099795.1	3.28801	-0.746857	0.131834	-5.66511	1.46927e-08	5.04286e-08	none
RNU6-880P	0.564146	-0.423026	0.167288	-2.52873	0.0114476	0.0184853	none
AL161637.1	0.15243	-0.314017	0.374152	-0.839277	0.401314		none
FAM183A	83.7159	-0.11727	0.0970417	-1.20845	0.226875	0.27768	none
EBNA1BP2	4029.83	-0.219059	0.0340755	-6.42864	1.28751e-10	5.47887e-10	none
MIR6733	0
CFAP57	144.773	0.505871	0.0862988	5.86186	4.57721e-09	1.65637e-08	none
RNA5SP46	0.35534	-0.0837214	0.202236	-0.413979	0.678889	0.720255	none
TMEM125	1538.4	0.0359293	0.0507489	0.707982	0.478957	0.532758	none
C1orf210	840.211	0.129562	0.0445658	2.90721	0.00364671	0.00638855	none
TIE1	1537.11	0.420404	0.0497639	8.44796	2.96424e-17	2.37546e-16	none
MPL	46.1431	-0.178162	0.0498965	-3.57062	0.000356137	0.000721645	none
AL139289.2	1.52572	-0.564696	0.117489	-4.80639	1.53681e-06	4.21085e-06	none
AL139289.1	58.7263	-0.577197	0.0676589	-8.53099	1.45105e-17	1.19788e-16	none
CDC20	2491.83	-1.18279	0.0732099	-16.1561	1.02825e-58	5.0642e-56	down
ELOVL1	5506.61	-0.22632	0.0338373	-6.68846	2.2553e-11	1.03819e-10	none
MIR6734	0
MED8	1959.77	-0.294842	0.0281887	-10.4596	1.32412e-25	2.24704e-24	none
MED8-AS1	22.9342	-0.395267	0.0575337	-6.87019	6.41181e-12	3.11245e-11	none
SZT2	2238.79	0.124001	0.0338712	3.66095	0.000251282	0.000519415	none
SZT2-AS1	0.0302948	-0.225862	1.30273	-0.173376	0.862356		none
MIR6735	0
HYI	0
HYI-AS1	2.01913	-0.343047	0.109569	-3.13088	0.00174285	0.00320127	none
PTPRF	41326.2	0.114002	0.0410247	2.77886	0.00545493	0.00929825	none
KDM4A	1457.9	0.0631497	0.0283065	2.23093	0.0256858	0.0389598	none
AL451062.2	0
KDM4A-AS1	83.5112	-0.412105	0.0565481	-7.28769	3.15305e-13	1.72544e-12	none
ST3GAL3	87.5011	-0.702678	0.0654171	-10.7415	6.49806e-27	1.2467e-25	none
ST3GAL3-AS1	1.06791	-1.69484	0.213215	-7.94899	1.88034e-15	1.27494e-14	down
AL451062.1	1.14551	-2.60889	0.299419	-8.71317	2.9548e-18	2.58649e-17	down
MIR6079	0
SHMT1P1	2.26783	-2.79598	0.217152	-12.8757	6.17046e-38	3.55466e-36	down
ARTN	290.161	-0.16595	0.0948225	-1.75011	0.0800995	0.109756	none
AL357079.1	75.5054	-0.0843546	0.0497544	-1.69542	0.089996	0.121911	none
AL357079.3	26.6785	-0.0986958	0.0502377	-1.96458	0.0494633	0.0707964	none
IPO13	2883.49	0.0103479	0.027604	0.374869	0.707758	0.746412	none
AL357079.2	5.06812	-0.401872	0.078209	-5.13843	2.7704e-07	8.30082e-07	none
DPH2	1486.59	-0.303228	0.0357839	-8.47387	2.37382e-17	1.91936e-16	none
ATP6V0B	8752.83	-0.161606	0.0411988	-3.9226	8.76003e-05	0.000192795	none
B4GALT2	3921.4	-0.303466	0.038933	-7.79458	6.4623e-15	4.15832e-14	none
CCDC24	1026.5	0.1413	0.0559424	2.52581	0.0115432	0.0186269	none
SLC6A9	1752.82	-0.107309	0.0729774	-1.47044	0.141443	0.182839	none
AL139220.2	116.842	-0.54454	0.0933758	-5.8317	5.48656e-09	1.96875e-08	none
AL139220.1	1.96396	-0.660085	0.225055	-2.933	0.00335709	0.00591191	none
KRT8P47	0.0175982	-0.0858933	1.32457	-0.0648464	0.948296		none
RN7SL479P	0.226519	-0.922649	0.691821	-1.33365	0.182318	0.229037	none
KLF17	14.7918	-0.168248	0.135265	-1.24384	0.213558	0.263351	none
AL356653.1	2.94207	-0.6282	0.0824027	-7.62354	2.46815e-14	1.50194e-13	none
KLF18	0.186599	-0.329783	0.468379	-0.704095	0.481373		none
AL359839.1	0.0807416	-0.220475	0.684897	-0.32191	0.747521		none
OOSP1P1	0.0388801	-0.189544	1.17882	-0.160791	0.872258		none
AL035417.1	0.0115184	-0.132622	2.44165	-0.0543166	0.956683		none
AL035417.2	0.967857	-0.682067	0.142743	-4.77829	1.7679e-06	4.81255e-06	none
DMAP1	1976.06	-0.0836941	0.0362196	-2.31074	0.0208472	0.0321773	none
ERI3	3346.08	-0.288221	0.0320389	-8.99599	2.34117e-19	2.23676e-18	none
ERI3-IT1	7.13022	-0.684544	0.106629	-6.41985	1.36413e-10	5.79009e-10	none
RNU6-369P	0.0133232	-0.122255	2.8506	-0.0428874	0.965791		none
RNF220	2503.17	-0.215423	0.0298195	-7.22421	5.0401e-13	2.70848e-12	none
MIR5584	0.0153295	-0.132624	2.81816	-0.0470606	0.962465		none
TMEM53	464.194	0.0125512	0.0389116	0.322556	0.747031	0.782126	none
ARMH1	113.542	-0.311716	0.0667382	-4.67073	3.00129e-06	7.95033e-06	none
RNU5F-1	2.18907	-0.555189	0.12349	-4.49581	6.9306e-06	1.75688e-05	none
RNU5D-1	1.6516	-2.19899	0.226636	-9.70273	2.93533e-22	3.63816e-21	down
KIF2C	1570.33	-0.957208	0.0677795	-14.1224	2.76516e-45	3.27854e-43	none
AL592166.1	3.94601	-0.663455	0.0813067	-8.15991	3.35264e-16	2.43656e-15	none
RPS8	55134.6	-0.301134	0.0433401	-6.94817	3.70056e-12	1.83708e-11	none
SNORD55	0
SNORD46	6.59333	-0.59201	0.0854421	-6.92879	4.24445e-12	2.09594e-11	none
SNORD38A	0.113171	-0.199403	0.388762	-0.512918	0.608009		none
SNORD38B	0
RPS15AP11	7.74422	-0.552382	0.0651953	-8.47273	2.39698e-17	1.93773e-16	none
BEST4	37.223	-0.371393	0.0828428	-4.4831	7.35674e-06	1.85776e-05	none
PLK3	934.909	0.205379	0.044682	4.59647	4.29718e-06	1.11719e-05	none
TCTEX1D4	23.792	0.061375	0.0747174	0.821428	0.411402	0.466802	none
BTBD19	249.454	0.0412509	0.0542531	0.760342	0.44705	0.501801	none
PTCH2	182.556	0.309831	0.0684226	4.5282	5.94879e-06	1.52011e-05	none
RNU5E-6P	0
AL136380.1	6.44175	-0.617846	0.0783479	-7.88593	3.12205e-15	2.0708e-14	none
EIF2B3	1666.18	-0.231244	0.0282606	-8.18256	2.77887e-16	2.03469e-15	none
RNA5SP47	0.351402	-0.673504	0.341595	-1.97164	0.0486505	0.0697354	none
CCNB1IP1P1	0.335992	-0.77695	0.328147	-2.36769	0.0178996	0.027954	none
PPIAP35	3.88639	-0.950926	0.0859507	-11.0636	1.88334e-28	4.19937e-27	none
MRPS17P1	6.30594	-1.21913	0.100132	-12.1753	4.20863e-34	1.63877e-32	down
HECTD3	3548.43	0.0127218	0.0271318	0.468889	0.639149	0.68371	none
UROD	3149.36	-0.0603808	0.0334745	-1.80378	0.0712652	0.0987529	none
ZSWIM5	428.081	0.461202	0.0770272	5.98752	2.13068e-09	7.9877e-09	none
OSTCP5	0.324594	-0.437325	0.18198	-2.40315	0.0162543	0.0255663	none
LINC01144	93.1065	-0.102095	0.0564936	-1.8072	0.0707311	0.0980947	none
HPDL	164.366	-1.60657	0.111243	-14.4421	2.81306e-47	4.20253e-45	down
MUTYH	31.0047	-0.283959	0.0508725	-5.58178	2.38076e-08	8.00216e-08	none
AL451136.1	0
TOE1	656.527	-0.0796748	0.0304401	-2.61743	0.00885952	0.0145878	none
TESK2	674.299	0.37131	0.0555475	6.68455	2.31636e-11	1.06455e-10	none
PPIAP36	1.91694	-1.0844	0.127252	-8.52174	1.57174e-17	1.29205e-16	down
CCDC163	221.589	-0.12346	0.0529676	-2.33086	0.0197606	0.0306277	none
MMACHC	714.35	-0.268358	0.0374085	-7.17372	7.29855e-13	3.86651e-12	none
PRDX1	15426	-0.313797	0.0407281	-7.70469	1.31164e-14	8.19416e-14	none
HMGB1P48	0.110209	-0.365705	0.451111	-0.810678	0.417551		none
AKR1A1	7340.71	-0.141116	0.0354186	-3.98424	6.76955e-05	0.000151203	none
AL355480.3	1.48947	0.00948926	0.0941701	0.100767	0.919735	0.932131	none
AL355480.1	2.81973	0.0327711	0.0853787	0.383832	0.701103	0.740352	none
NASP	6266.75	-0.492041	0.0392468	-12.5371	4.67893e-36	2.21203e-34	none
AL355480.2	0.353927	-0.728613	0.1781	-4.09104	4.29442e-05	9.85293e-05	none
AL355480.4	0.240565	-0.199387	0.222048	-0.897946	0.369214	0.424926	none
CCDC17	61.8275	-0.303247	0.0680076	-4.45902	8.23354e-06	2.06625e-05	none
GPBP1L1	8186.51	-0.0367768	0.0235878	-1.55914	0.118962	0.156482	none
RPS15AP10	14.4847	-0.418586	0.0738104	-5.6711	1.41884e-08	4.87689e-08	none
AL604028.2	24.1144	-0.189957	0.0669072	-2.83911	0.00452395	0.00780846	none
TMEM69	1737.3	-0.152185	0.0277798	-5.47826	4.29534e-08	1.40476e-07	none
IPP	1035.67	0.175571	0.0331574	5.29507	1.18969e-07	3.7141e-07	none
AL604028.1	129.841	-0.0409895	0.0368192	-1.11326	0.265595	0.318811	none
AL603882.1	4.05954	-0.19813	0.0726304	-2.72792	0.00637345	0.010741	none
MAST2	4972.15	0.00856987	0.032284	0.265453	0.790661	0.821145	none
TMA16P2	1.68342	-2.59745	0.210069	-12.3648	4.05354e-35	1.7302e-33	down
PIK3R3	7095.73	-0.0726629	0.0483876	-1.50168	0.133179	0.173194	none
P3R3URF-PIK3R3	0
AL358075.1	8.70886	-0.724488	0.0911492	-7.94837	1.88978e-15	1.28094e-14	none
AL358075.3	0.993034	-2.21881	0.232878	-9.52777	1.60694e-21	1.86611e-20	down
AL358075.2	18.6971	-0.685394	0.0783317	-8.74989	2.13559e-18	1.88746e-17	none
TSPAN1	6115.91	0.575992	0.110974	5.19035	2.09901e-07	6.38347e-07	none
P3R3URF	0.0620527	-0.184186	0.676454	-0.272281	0.785406		none
POMGNT1	5041.11	0.252351	0.0315267	8.00436	1.20087e-15	8.27883e-15	none
LURAP1	32.5194	0.297835	0.0617367	4.82429	1.40506e-06	3.86733e-06	none
RAD54L	324.071	-0.702859	0.0666487	-10.5457	5.31588e-26	9.38351e-25	none
LRRC41	5837.25	0.0539649	0.026524	2.03456	0.0418947	0.0608792	none
UQCRH	5916.01	-0.593196	0.0426815	-13.8982	6.4966e-44	6.94903e-42	none
NSUN4	1871.45	-0.00428769	0.0247375	-0.173327	0.862394	0.883689	none
AL122001.1	1.29603	-1.29748	0.169921	-7.63578	2.24453e-14	1.372e-13	down
FAAH	2157.45	0.346815	0.0563693	6.15255	7.62451e-10	2.99671e-09	none
FAAHP1	73.3748	0.0359284	0.0895648	0.401144	0.688314	0.728874	none
LINC01398	3.46856	-0.0648475	0.113859	-0.56954	0.56899	0.618715	none
DMBX1	60.0754	-0.772917	0.115148	-6.71239	1.91465e-11	8.87485e-11	none
TMEM275	0.172941	0.117432	0.328146	0.357865	0.720444		none
MKNK1-AS1	14.655	-0.159064	0.0691987	-2.29865	0.0215248	0.0331375	none
KNCN	1.34705	-0.0506061	0.256974	-0.196931	0.843882	0.867835	none
MKNK1	1308.78	0.00967993	0.0256668	0.377139	0.706071	0.744773	none
MOB3C	1060.09	0.182307	0.0296443	6.14981	7.75753e-10	3.04686e-09	none
ATPAF1	3541.7	-0.0211116	0.0287425	-0.734508	0.462639	0.516968	none
NENFP1	0.826807	-1.19356	0.210291	-5.67576	1.38071e-08	4.75236e-08	down
TEX38	7.85772	-0.0526905	0.0744607	-0.707629	0.479176	0.532962	none
EFCAB14-AS1	0.300628	-0.822298	0.517104	-1.5902	0.11179	0.147933	none
EFCAB14	9662.74	0.26161	0.0277965	9.4116	4.88649e-21	5.42623e-20	none
AL593856.1	0.270727	-0.318178	0.240679	-1.322	0.186167	0.23331	none
CYP4B1	1726.73	0.56629	0.128416	4.40979	1.03469e-05	2.56386e-05	none
CYP4Z2P	657.057	-0.191017	0.142591	-1.33961	0.180371	0.226909	none
TUBAP8	10.3842	0.0854544	0.1689	0.505947	0.612894	0.659132	none
CYP4A11	15.6529	0.413716	0.136056	3.04078	0.00235966	0.00425045	none
CYP4A26P	0.133784	-0.168437	0.496136	-0.339498	0.734235		none
CYP4A43P	0.119528	-0.189194	0.487154	-0.388365	0.697746		none
CYP4A27P	0.170626	-0.282809	0.508288	-0.556395	0.577941		none
CYP4A44P	0.121778	-0.246278	0.611679	-0.402626	0.687223		none
CYP4X1	3502.5	0.553413	0.123411	4.48431	7.31496e-06	1.84772e-05	none
CYP4Z1	4757.06	0.547868	0.176815	3.09854	0.00194478	0.00354689	none
TUBAP9	22.9447	0.308255	0.175334	1.75811	0.0787294	0.108067	none
CYP4A22-AS1	17.2878	-0.170422	0.0723787	-2.35459	0.0185431	0.0288986	none
CYP4A22	18.0733	-0.164072	0.153217	-1.07084	0.284239	0.338327	none
MTND1P34	0.653171	-1.53092	0.279776	-5.47195	4.45121e-08	1.45341e-07	down
LINC00853	54.2522	-0.154267	0.0687334	-2.24442	0.0248052	0.0377456	none
PDZK1IP1	2060.53	-0.717082	0.111614	-6.42463	1.32188e-10	5.61982e-10	none
TAL1	154.952	0.414827	0.0586417	7.07393	1.50603e-12	7.73605e-12	none
AL135960.1	6.93981	0.239197	0.0899834	2.65824	0.00785498	0.0130474	none
STIL	1104.68	-0.674787	0.0580046	-11.6333	2.78993e-31	8.14055e-30	none
CMPK1	9096.75	-0.172188	0.0313398	-5.49422	3.92441e-08	1.28891e-07	none
LINC01389	23.9739	-0.381737	0.082243	-4.64158	3.45753e-06	9.10098e-06	none
FOXE3	3.73163	-0.913823	0.131308	-6.95941	3.41705e-12	1.70124e-11	none
FOXD2-AS1	171.34	-0.369974	0.0620998	-5.95772	2.55774e-09	9.50285e-09	none
FOXD2	132.997	0.0885045	0.0856263	1.03361	0.301317	0.356045	none
AL356458.1	0.0771863	-0.168589	0.611685	-0.275614	0.782844		none
RPL21P24	0.0879879	-0.11674	0.628453	-0.185758	0.852634		none
ATP6V0E1P4	0.0836524	-0.137433	0.605557	-0.226954	0.82046		none
LINC01738	1.48582	0.172545	0.165827	1.04051	0.298102	0.352711	none
TRABD2B	298.015	0.896903	0.0886691	10.1152	4.73193e-24	6.90575e-23	none
AL691459.1	0
AC096541.1	4.99162	0.0536928	0.113738	0.472074	0.636874	0.681699	none
LINC02794	1.22529	0.274372	0.15922	1.72323	0.0848471	0.115604	none
AL356289.1	0.145863	-0.220342	0.457677	-0.481437	0.630206		none
CYP46A4P	0.0978867	-0.137396	0.533447	-0.257562	0.796745		none
SKINT1L	9.36041	0.305715	0.11253	2.71675	0.0065926	0.0110807	none
AL356289.2	1.27788	-0.383581	0.183588	-2.08935	0.0366758	0.0538895	none
AL109659.1	1.55614	0.530303	0.154868	3.42423	0.000616555	0.00120741	none
SLC5A9	49.4585	0.0100715	0.0831969	0.121056	0.903647	0.918693	none
AL109659.2	10.4392	0.0778762	0.0890318	0.874701	0.381737	0.437439	none
AL109659.3	2.50079	-0.389238	0.108639	-3.58285	0.00033987	0.000690588	none
SPATA6	960.437	0.271822	0.0472946	5.74743	9.06121e-09	3.18689e-08	none
PPP1R8P1	3.59157	-0.919462	0.113121	-8.12816	4.35861e-16	3.13052e-15	none
RNU6-723P	0.322486	-0.977114	0.683237	-1.43013	0.152681	0.195768	none
AL356968.2	7.09029	-0.316855	0.0811827	-3.90298	9.50142e-05	0.000208083	none
RNU4-61P	0.159433	-0.501181	0.443851	-1.12916	0.258828		none
AL356968.1	0.0781836	-0.111579	0.665058	-0.167773	0.866762		none
AGBL4	63.5458	-0.0687975	0.0787694	-0.873404	0.382443	0.438125	none
AL391844.1	1.09475	-0.580459	0.197465	-2.93955	0.00328688	0.00579496	none
BEND5	182.696	0.12453	0.0663169	1.87781	0.0604072	0.0849678	none
AL645507.1	0.455386	-1.15077	0.410442	-2.80373	0.00505146	0.00866257	down
AC099788.1	0.932398	-2.30832	0.341178	-6.76574	1.32625e-11	6.23256e-11	down
AGBL4-AS1	0.283703	-0.702818	0.53635	-1.31037	0.19007	0.23763	none
AGBL4-IT1	1.45163	-2.89754	0.273972	-10.576	3.84971e-26	6.88492e-25	down
AL390023.1	0.51227	-1.47665	0.322803	-4.57445	4.77466e-06	1.23459e-05	down
ZNF859P	1.17456	-2.73312	0.333382	-8.19817	2.44083e-16	1.79539e-15	down
AL645730.1	1.09568	-2.83758	0.365406	-7.76556	8.12879e-15	5.18452e-14	down
MTND2P29	0.65087	-1.69224	0.281248	-6.01688	1.7781e-09	6.72102e-09	down
ELAVL4	26.2975	-0.675576	0.0833482	-8.10547	5.25435e-16	3.74566e-15	none
AL583843.1	0.0755077	-0.256784	0.859037	-0.29892	0.765001		none
ELAVL4-AS1	0.139711	-0.287828	0.593505	-0.484963	0.627703		none
AL592182.1	0.0346218	-0.179214	1.99948	-0.0896302	0.928581		none
LINC02808	0.183685	-0.0541922	0.347493	-0.155952	0.876071		none
AL592182.2	0.131762	-0.147402	0.52772	-0.279319	0.78		none
AL596275.1	3.98618	-0.421839	0.078172	-5.39629	6.80317e-08	2.17851e-07	none
HMGB1P45	0.226904	-0.43376	0.285694	-1.51827	0.128947	0.168258	none
FCF1P6	0.177174	-0.422916	0.319704	-1.32284	0.18589		none
DMRTA2	9.72331	-2.01479	0.189488	-10.6328	2.0963e-26	3.8442e-25	down
AL049637.1	0.584701	-1.76234	0.30643	-5.7512	8.86136e-09	3.11807e-08	down
FAF1	3411.09	-0.248281	0.0284827	-8.71691	2.85906e-18	2.50562e-17	none
FAF1-AS1	3.1127	-1.78567	0.161365	-11.066	1.83325e-28	4.09175e-27	down
RNU6-1026P	0.341788	-1.05135	0.499186	-2.10613	0.0351928	0.0519027	none
PHBP12	6.032	-1.15162	0.112157	-10.2679	9.83635e-25	1.5398e-23	down
MRPS6P2	1.08905	-2.81397	0.329367	-8.54358	1.30121e-17	1.07956e-16	down
CDKN2C	1110.09	-0.405507	0.0537553	-7.54357	4.57287e-14	2.70557e-13	none
MIR4421	0.099666	-0.106231	0.459098	-0.23139	0.817012		none
MIR6500	0.112652	0.0494467	0.383854	0.128816	0.897503		none
C1orf185	0.352585	-0.356509	0.24038	-1.4831	0.138047	0.178851	none
CFL1P2	3.24116	-0.220612	0.0744008	-2.96519	0.00302498	0.00535991	none
LINC01562	3.61979	-0.125628	0.0884988	-1.41955	0.15574	0.199285	none
RNF11	6481.33	0.093122	0.030832	3.02031	0.00252518	0.00453039	none
AL162430.1	14.0191	-0.51516	0.0599826	-8.58849	8.81235e-18	7.41973e-17	none
AL162430.2	6.72622	-0.266047	0.097561	-2.72698	0.00639168	0.0107701	none
TTC39A	7760.97	0.437809	0.0715869	6.11576	9.60965e-10	3.73696e-09	none
TTC39A-AS1	67.7927	0.364396	0.0819307	4.44761	8.68321e-06	2.17313e-05	none
EPS15	4878.35	-0.0345869	0.0256856	-1.34655	0.178125	0.22438	none
AL671986.1	7.54003	-1.06844	0.0920259	-11.6102	3.65858e-31	1.05719e-29	down
RNU6-877P	0.568765	-1.40211	0.288892	-4.8534	1.21364e-06	3.36528e-06	down
AC104170.1	4.80428	-0.924871	0.0907868	-10.1873	2.25986e-24	3.39533e-23	none
EPS15-AS1	7.18219	-0.231433	0.082583	-2.80243	0.00507198	0.00869577	none
RNU6-1281P	0.195901	-0.334702	0.485113	-0.689946	0.490228	0.543542	none
CALR4P	12.4878	-0.62004	0.0985349	-6.29259	3.12206e-10	1.27727e-09	none
OSBPL9	5008.14	-0.0482742	0.03269	-1.47672	0.13975	0.180842	none
GAPDHP51	1.31663	-2.36564	0.228889	-10.3353	4.8782e-25	7.8786e-24	down
SLC25A6P3	0.863163	-2.3043	0.355121	-6.48879	8.6531e-11	3.74483e-10	down
AL050343.1	0.625841	-1.54177	0.311404	-4.95103	7.38225e-07	2.10095e-06	down
NRDC	8299.75	-0.176913	0.0252696	-7.00099	2.54155e-12	1.28057e-11	none
AL050343.2	19.938	-0.259551	0.0655034	-3.9624	7.41992e-05	0.000164953	none
AL050343.3	1.13966	-1.31654	0.174966	-7.52453	5.29087e-14	3.1123e-13	down
MIR761	0.026044	-0.199942	1.30856	-0.152796	0.87856		none
TSEN15P2	2.11463	-2.22683	0.176551	-12.6129	1.79203e-36	8.85504e-35	down
RAB3B	482.249	0.292826	0.114935	2.54775	0.0108419	0.0175749	none
RNA5SP48	0.0813976	-0.0907738	0.573742	-0.158214	0.874288		none
AL445685.2	0.782122	-0.984735	0.286867	-3.43272	0.000597549	0.00117321	none
RN7SL290P	0.111164	-0.57889	0.886228	-0.653206	0.513623		none
TXNDC12	252.527	0.126414	0.0357557	3.53549	0.000407024	0.000818321	none
AL445685.3	0
KTI12	207.919	-0.470508	0.0323819	-14.53	7.82629e-48	1.23507e-45	none
AL445685.1	1.84096	-1.3677	0.153259	-8.92411	4.49283e-19	4.18976e-18	down
TXNDC12-AS1	2.29865	-0.973973	0.129563	-7.51738	5.58858e-14	3.28097e-13	none
BTF3L4	3876.38	-0.296626	0.0264539	-11.2129	3.52298e-29	8.43445e-28	none
ZFYVE9	1700.68	0.219749	0.0473897	4.63706	3.53405e-06	9.29023e-06	none
RN7SL788P	0.592964	-2.18401	0.437818	-4.98841	6.08797e-07	1.75174e-06	down
AL139156.2	7.63287	-0.424591	0.068112	-6.23372	4.55498e-10	1.8332e-09	none
AL139156.1	0.974316	-2.41734	0.286087	-8.44968	2.92096e-17	2.34231e-16	down
PDCL3P6	0.905266	-1.15795	0.16974	-6.82193	8.98228e-12	4.29406e-11	down
AL139156.3	0.419127	-1.16704	0.427229	-2.73164	0.00630191	0.0106268	down
DNAJC19P7	0.563055	-1.3722	0.289942	-4.73266	2.21591e-06	5.96473e-06	down
ANAPC10P1	1.12942	-2.25353	0.221146	-10.1902	2.19242e-24	3.30064e-23	down
CC2D1B	2089	-0.0833496	0.0258297	-3.22689	0.00125142	0.0023469	none
AL513218.1	3.58374	-0.441415	0.0841732	-5.24413	1.5702e-07	4.84465e-07	none
AL513218.2	5.22049	-0.36844	0.0745137	-4.9446	7.63001e-07	2.16804e-06	none
PLA2G12AP1	9.11198	-0.233328	0.0534518	-4.3652	1.27007e-05	3.11065e-05	none
ORC1	420.35	-0.808986	0.0671038	-12.0558	1.80868e-33	6.56368e-32	none
PRPF38A	3274.33	-0.19113	0.0252045	-7.58315	3.37254e-14	2.02262e-13	none
TUT4	1569.74	-0.378022	0.0579949	-6.51819	7.11585e-11	3.10836e-10	none
AL591167.1	0.732617	-1.37066	0.223808	-6.12425	9.11132e-10	3.55366e-09	down
EEF1GP7	0.681002	-1.22279	0.172698	-7.08055	1.43585e-12	7.39081e-12	down
GPX7	828.388	-0.429606	0.063239	-6.79338	1.09537e-11	5.19113e-11	none
SHISAL2A	46.7516	-0.379046	0.0741022	-5.11517	3.13453e-07	9.33319e-07	none
COA7	1717.96	-0.375063	0.0374718	-10.0092	1.38849e-23	1.94467e-22	none
NDUFS5P3	0.286003	-0.385938	0.184657	-2.09002	0.036616	0.0538105	none
RN7SL62P	0.189252	-1.10077	0.763717	-1.44133	0.14949
ZYG11B	2616.09	-0.0177522	0.0321703	-0.551819	0.581072	0.629944	none
RNU2-30P	0.175702	-0.490714	0.426726	-1.14995	0.250165		none
RPS13P2	40.8323	-0.364798	0.062419	-5.84433	5.08598e-09	1.83116e-08	none
RNU6-969P	0.895266	-0.84262	0.158536	-5.31499	1.06661e-07	3.34662e-07	none
ZYG11A	345.399	-0.720533	0.0751475	-9.58824	8.95977e-22	1.06798e-20	none
AC099677.3	1.67349	-0.888164	0.123219	-7.20804	5.67645e-13	3.03734e-12	none
ECHDC2	3345.84	0.159917	0.0507749	3.14953	0.00163532	0.00301588	none
AC099677.1	31.5604	0.167582	0.0903919	1.85395	0.0637465	0.0892698	none
AC099677.2	0.424014	0.109679	0.199601	0.54949	0.582669	0.631445	none
SCP2	8595.92	0.134001	0.0356873	3.75485	0.000173447	0.000366141	none
AC099677.4	0.336781	-0.244688	0.240258	-1.01844	0.308468	0.363241	none
AC099677.6	0.0302054	-0.091026	0.94266	-0.096563	0.923073		none
AC099677.5	0.137455	-0.402016	0.621519	-0.646828	0.517743		none
H3P2	0.41358	-0.668851	0.299968	-2.22974	0.0257648	0.0390599	none
RRAS2P1	4.04222	-0.380664	0.146439	-2.59947	0.00933676	0.0153117	none
TUBBP10	0.52616	-0.153406	0.151741	-1.01097	0.312031	0.366742	none
PODN	2752.12	0.735911	0.0728417	10.1029	5.36473e-24	7.78364e-23	none
AL445183.1	0.00268014	-0.111913	2.88795	-0.0387518	0.969088		none
HIGD1AP11	0
SLC1A7	65.5702	0.62221	0.0812233	7.66049	1.85227e-14	1.14109e-13	none
AL445183.2	1.6293	0.364394	0.131453	2.77205	0.00557045	0.0094811	none
AL606760.4	0.222011	0.251108	0.267273	0.939519	0.347464	0.40279	none
CPT2	760.498	0.10431	0.0296577	3.51714	0.000436215	0.000872781	none
AL606760.2	3.95724	-0.150892	0.0429734	-3.51129	0.000445932	0.000890773	none
CZIB	1706.61	-0.0935404	0.0272562	-3.4319	0.000599373	0.00117654	none
AL606760.3	2.70534	-0.452634	0.100717	-4.49413	6.98564e-06	1.76983e-05	none
MAGOH	1668.44	-0.589654	0.0378023	-15.5983	7.47079e-55	2.30914e-52	none
AL606760.1	44.52	0.0867038	0.0496303	1.74699	0.0806387	0.110427	none
LRP8	665.913	-0.829278	0.0742555	-11.1679	5.8541e-29	1.37871e-27	none
AL355483.3	0
AL355483.1	0.421199	-1.14647	0.24811	-4.62081	3.82244e-06	1.00008e-05	down
AL355483.2	1.00741	-2.22144	0.243738	-9.11403	7.938e-20	7.90765e-19	down
LINC01771	2.76783	-0.624801	0.116343	-5.37032	7.85986e-08	2.49939e-07	none
AC119428.2	3.95389	-0.423622	0.12044	-3.5173	0.000435962	0.000872312	none
AC119428.1	0.0370605	-0.132477	0.939839	-0.140957	0.887904		none
LINC02812	6.36666	-0.386592	0.110673	-3.4931	0.000477452	0.000949944	none
SLC25A3P1	0.233655	-0.519906	0.349202	-1.48884	0.13653	0.177091	none
AL365445.1	0.00291319	-0.101544	2.88795	-0.0351611	0.971951		none
DMRTB1	0.461477	-0.974843	0.373918	-2.6071	0.00913125	0.015006	none
GLIS1	63.3976	0.25712	0.0850208	3.0242	0.00249289	0.00447496	none
RNU7-95P	0.111762	-0.36569	1.22343	-0.298906	0.765012		none
NDC1	3100.57	-0.323621	0.0399102	-8.10872	5.11565e-16	3.65085e-15	none
AL049745.1	0.752393	-0.494926	0.146154	-3.38634	0.000708323	0.0013757	none
AL049745.2	0.190582	-0.224535	0.245915	-0.913061	0.36121		none
YIPF1	3257.01	0.0232647	0.0355986	0.653528	0.513416	0.566072	none
DIO1	758.223	0.144886	0.147124	0.98479	0.324727	0.379752	none
HSPB11	1297.88	-0.325425	0.0372761	-8.73013	2.54376e-18	2.23717e-17	none
LRRC42	2107.98	-0.104499	0.0353893	-2.95285	0.00314853	0.00556277	none
HNRNPA3P12	11.1629	-0.180641	0.0483299	-3.73766	0.000185742	0.000390587	none
LDLRAD1	70.2097	-0.0106541	0.127858	-0.0833271	0.933591	0.943528	none
TMEM59	18934.4	0.195365	0.0337109	5.7953	6.82002e-09	2.42606e-08	none
AL353898.3	23.7668	-0.124783	0.0537678	-2.32078	0.0202985	0.0313898	none
TCEANC2	871.207	0.00364152	0.0278827	0.130602	0.896091	0.912107	none
MIR4781	0.00908338	-0.122241	2.02877	-0.0602538	0.951953		none
AL353898.1	1.09912	-0.902534	0.129474	-6.97077	3.15213e-12	1.57389e-11	none
AL353898.2	0
AL357673.1	1.7147	-0.395497	0.104528	-3.78366	0.000154538	0.000328265	none
CDCP2	0.219094	-0.386368	0.2491	-1.55106	0.120888	0.158787	none
AL357673.2	2.37707	-0.646125	0.117364	-5.50532	3.68494e-08	1.21426e-07	none
CYB5RL	469.55	0.172163	0.0368284	4.67473	2.94345e-06	7.80451e-06	none
MRPL37	4764.81	-0.379644	0.0374075	-10.1489	3.35172e-24	4.95931e-23	none
SSBP3	3993.34	-0.209168	0.0385288	-5.42887	5.67113e-08	1.83053e-07	none
SSBP3-AS1	34.499	-0.17077	0.0622517	-2.74322	0.00608399	0.0102829	none
AL161644.1	1.25684	-2.47715	0.268001	-9.24307	2.39531e-20	2.49021e-19	down
AL035415.1	0.0337859	-0.148056	1.21928	-0.121429	0.903351		none
AC099796.2	0.114009	-0.14768	0.417199	-0.353979	0.723355		none
LINC02784	0.0453157	-0.230977	1.24959	-0.184842	0.853353		none
AC099796.1	0.0975208	-0.230697	0.452785	-0.509507	0.610397		none
HNRNPA1P63	0.582921	-0.262988	0.137623	-1.91093	0.0560137	0.0792631	none
ACOT11	144.654	-0.0588394	0.074069	-0.794386	0.426971	0.482051	none
FAM151A	9.19542	-0.121435	0.0895041	-1.35676	0.174858	0.220699	none
AL590093.1	0.618122	-0.438173	0.172267	-2.54358	0.0109724	0.0177717	none
MROH7	10.5721	-0.15685	0.0918599	-1.70749	0.0877307	0.119142	none
MROH7-TTC4	0.362832	-0.139994	0.194982	-0.717984	0.472767	0.526985	none
TTC4	45.2617	-0.155894	0.0361487	-4.31257	1.61371e-05	3.90662e-05	none
PARS2	482.219	-0.135237	0.0327306	-4.13182	3.59909e-05	8.33181e-05	none
TTC22	718.649	-0.383558	0.0916731	-4.18398	2.86453e-05	6.71665e-05	none
AC096536.1	2.15705	-0.177434	0.13654	-1.2995	0.193772	0.241766	none
LEXM	9.95604	-0.36859	0.0870108	-4.23614	2.27394e-05	5.40426e-05	none
DHCR24	41989.1	0.249156	0.0604972	4.11847	3.81393e-05	8.80144e-05	none
AC096536.3	2.06624	-1.62539	0.16934	-9.59834	8.1242e-22	9.71998e-21	down
AC096536.2	1.32983	-0.0520767	0.105488	-0.493675	0.621536	0.66729	none
DHCR24-DT	18.0951	-0.320108	0.0635988	-5.03325	4.82244e-07	1.40473e-06	none
AL590440.2	1.76256	-0.211317	0.114193	-1.85052	0.0642385	0.0898857	none
TMEM61	39.2165	-0.173093	0.0969313	-1.78573	0.0741429	0.102354	none
AL590440.1	0
BSND	7.28074	-0.533615	0.121021	-4.40929	1.03709e-05	2.56952e-05	none
PCSK9	80.5556	-0.176893	0.115935	-1.5258	0.127059	0.16608	none
USP24	5331.05	-0.0652827	0.0364086	-1.79306	0.0729636	0.100876	none
MIR4422HG	1.34003	-0.34864	0.151556	-2.3004	0.0214256	0.0329939	none
GYG1P3	0.399969	-0.299136	0.171301	-1.74626	0.0807663	0.110585	none
MIR4422	0.0280998	-0.174032	1.39929	-0.124372	0.901021		none
AL603840.1	9.04991	-0.329106	0.137942	-2.38583	0.0170406	0.0267185	none
GOT2P1	0.0775607	-0.282685	0.895409	-0.315705	0.752226		none
MTCO2P34	0.0342844	-0.174033	1.79495	-0.0969569	0.922761		none
RN7SKP291	0.301916	-1.15247	1.01304	-1.13763	0.255273	0.308013	none
RNU6-830P	0.00683992	-0.101534	2.88795	-0.0351579	0.971954		none
LINC01755	0.382345	-0.249786	0.242253	-1.03109	0.302497	0.35726	none
LINC01753	0.0986043	-0.318936	0.719418	-0.443325	0.65753		none
PIGQP1	0.10669	-0.199689	0.627669	-0.318144	0.750376		none
AL353681.1	0.122378	-0.267038	0.554814	-0.48131	0.630296		none
AC119674.1	5.44372	-1.00586	0.106992	-9.40119	5.39484e-21	5.97297e-20	down
AC119674.2	3.85215	-0.624006	0.0942319	-6.62202	3.54315e-11	1.59723e-10	none
RPSAP20	0.803268	-0.616564	0.165105	-3.73436	0.000188191	0.000395384	none
LINC01767	6.09863	-1.31352	0.116111	-11.3126	1.13634e-29	2.84834e-28	down
PLPP3	2690.46	0.330216	0.044023	7.50099	6.33377e-14	3.70149e-13	none
RPL21P23	1.12088	-2.00354	0.226443	-8.84786	8.92117e-19	8.12495e-18	down
RPL23AP85	0.543947	-0.474648	0.168174	-2.82237	0.00476705	0.0082031	none
AC099789.1	0.914112	-0.847397	0.123934	-6.83747	8.06033e-12	3.87231e-11	none
PRKAA2	1057.16	0.177917	0.0989618	1.79784	0.0722024	0.0999279	none
FYB2	241.692	0.75265	0.114531	6.57156	4.97893e-11	2.21133e-10	none
AL360295.1	0.319569	0.00198731	0.287865	0.00690364	0.994492	0.995425	none
C8A	0.62344	-1.49718	0.317937	-4.70906	2.48865e-06	6.65805e-06	down
C8B	3.94226	-0.375624	0.200961	-1.86914	0.0616027	0.0864838	none
AL161740.1	0.0929122	-0.127035	0.50354	-0.252285	0.800821		none
DAB1	81.2924	0.730912	0.118744	6.15535	7.49109e-10	2.94686e-09	none
AL390243.1	0.375836	0.18959	0.361689	0.524179	0.600154	0.647591	none
RPS20P5	0.30706	-0.380627	0.196124	-1.94074	0.0522895	0.0744444	none
DAB1-AS1	1.17503	-2.52717	0.320009	-7.8972	2.85234e-15	1.89865e-14	down
HNRNPA1P6	2.8851	-0.130551	0.0744557	-1.7534	0.0795326	0.109073	none
RPS26P15	5.08345	-0.42026	0.0799421	-5.25705	1.46384e-07	4.53177e-07	none
AL445193.2	0.436336	-0.966248	0.413536	-2.33655	0.0194626	0.0302065	none
AL445193.1	0.125326	-0.350073	0.779508	-0.449095	0.653363		none
AL357373.1	0.536501	-0.604206	0.208961	-2.89147	0.00383444	0.00669127	none
OMA1	909.462	-0.0585065	0.0333484	-1.7544	0.0793614	0.108851	none
AL035411.3	16.5371	0.0628489	0.0588602	1.06776	0.285627	0.339807	none
AL035411.2	0.371015	-0.243767	0.204494	-1.19205	0.233242	0.28454	none
RN7SL713P	0.216149	-0.57073	0.462305	-1.23453	0.217005	0.267036	none
TACSTD2	19524.1	-0.055537	0.0661727	-0.839274	0.401316	0.456861	none
AL035411.1	14.1151	-0.204273	0.0547906	-3.72825	0.000192814	0.000404529	none
MYSM1	2315.71	0.0387998	0.0477606	0.812381	0.416573	0.471797	none
AL136985.3	12.0108	0.134193	0.08325	1.61193	0.106977	0.142223	none
JUN	12599.5	0.389373	0.0609444	6.38898	1.66994e-10	7.01897e-10	none
LINC01135	160.841	-0.422036	0.0590236	-7.1503	8.65911e-13	4.55444e-12	none
AL136985.2	7.04596	-0.362026	0.0734397	-4.92958	8.24085e-07	2.33242e-06	none
AL136985.1	0.549807	-1.2893	0.270467	-4.76696	1.8703e-06	5.07496e-06	down
LINC02777	48.8226	-0.138927	0.0480044	-2.89405	0.00380302	0.00664188	none
LINC01358	30.2217	-0.62906	0.0690221	-9.11388	7.94854e-20	7.91463e-19	none
PHBP3	1.25254	-0.26915	0.114238	-2.35604	0.0184708	0.0287919	none
AL592431.2	0.476654	-0.40048	0.228805	-1.75032	0.0800639	0.109711	none
AL592431.1	0.715236	-0.711964	0.171392	-4.15401	3.267e-05	7.60664e-05	none
HSD52	14.8846	-0.389878	0.0657857	-5.92649	3.09483e-09	1.13944e-08	none
AC093424.1	2.03986	-0.941179	0.12849	-7.32492	2.39035e-13	1.32506e-12	none
FGGY	588.493	0.0398018	0.0404068	0.985028	0.32461	0.379645	none
MIR4711	0.10791	-0.199615	0.546785	-0.36507	0.715059		none
AL035416.1	2.47766	-0.286028	0.111373	-2.5682	0.0102227	0.0166592	none
HOOK1	2904.38	0.0243914	0.0475356	0.513117	0.607869	0.654372	none
CYP2J2	732.83	-0.37532	0.0814057	-4.61048	4.01736e-06	1.04765e-05	none
RN7SL475P	0.102255	-0.453792	1.20367	-0.377007	0.706168		none
C1orf87	2.36053	-0.514456	0.241734	-2.12819	0.0333214	0.0493735	none
PGBD4P8	2.24697	-0.410734	0.31988	-1.28403	0.199133	0.247724	none
LINC02778	0.16655	-0.287918	0.576351	-0.499552	0.61739		none
LINC01748	13.1951	-1.00737	0.171108	-5.88737	3.92396e-09	1.43095e-08	down
AC099792.1	1.92824	-0.714734	0.148111	-4.82565	1.39545e-06	3.8423e-06	none
NFIA	6135.08	-0.376014	0.0683706	-5.49965	3.80553e-08	1.25225e-07	none
NFIA-AS2	23.345	-0.0957896	0.0908173	-1.05475	0.291539	0.345947	none
NFIA-AS1	4.23608	-2.10087	0.168625	-12.4589	1.25162e-35	5.63205e-34	down
AC099791.3	1.22343	-1.03881	0.187316	-5.54576	2.9268e-08	9.73601e-08	down
AC099791.4	3.68562	-0.271346	0.124741	-2.17527	0.0296097	0.0443369	none
AC099791.1	0.617803	-0.512003	0.17368	-2.94797	0.0031987	0.00564741	none
TM2D1	1464.03	0.0788201	0.0311973	2.5265	0.0115205	0.0185962	none
AC099791.2	3.65857	-0.593487	0.104033	-5.70479	1.16489e-08	4.04837e-08	none
PATJ	6733.27	0.255919	0.0497737	5.14165	2.72332e-07	8.16905e-07	none
RNU6-414P	1.06061	-2.60705	0.306862	-8.49583	1.96519e-17	1.60138e-16	down
RNU6-1177P	1.39315	-2.6125	0.265303	-9.84723	7.04606e-23	9.25529e-22	down
LAMTOR5P1	1.89015	-2.22005	0.200581	-11.0681	1.79165e-28	4.00622e-27	down
RN7SL180P	4.24399	-1.96134	0.145581	-13.4725	2.27191e-41	1.88212e-39	down
MIR3116-1	0.0252143	-0.132544	1.58256	-0.0837531	0.933253		none
MIR3116-2	0
PIGPP2	0.0338255	-0.153255	1.29933	-0.117949	0.906108		none
RPS15AP7	0.0536227	-0.158359	0.859523	-0.184241	0.853824		none
L1TD1	45.5856	0.118212	0.0992377	1.1912	0.233576	0.284917	none
AL162739.1	0.123846	-0.313505	0.444595	-0.705148	0.480718		none
KANK4	1072.14	-0.355919	0.100968	-3.52506	0.000423384	0.000848776	none
RNU6-371P	0.098415	-0.407158	0.954016	-0.426783	0.669538		none
USP1	4360.81	-0.368694	0.0452126	-8.15467	3.50133e-16	2.53879e-15	none
DOCK7	3092.36	-0.112213	0.0453184	-2.47609	0.0132829	0.0212173	none
AL451044.1	0.684707	-1.81285	0.314364	-5.76671	8.08352e-09	2.85445e-08	down
ANGPTL3	6.96173	-1.27663	0.115459	-11.057	2.02784e-28	4.50588e-27	down
AL138847.2	3.71441	-2.00319	0.158176	-12.6643	9.32808e-37	4.73998e-35	down
AL138847.1	1.49578	-1.34293	0.152728	-8.79297	1.45659e-18	1.30433e-17	down
AC103923.1	6.98285	-0.837797	0.102304	-8.18928	2.6279e-16	1.92793e-15	none
ATG4C	740.685	-0.112277	0.0277693	-4.04319	5.27285e-05	0.000119592	none
AC099794.1	1.23966	-0.144835	0.104149	-1.39065	0.164331	0.209066	none
AC099794.2	0.154492	-0.137402	0.330927	-0.415202	0.677994		none
LINC01739	0.102829	-0.251471	0.642679	-0.391285	0.695587		none
AL162400.3	0.102461	-0.2878	0.604345	-0.476218	0.633919		none
AL162400.1	0.0208699	-0.153332	2.18817	-0.0700733	0.944135		none
AL162400.2	0.056486	-0.246489	1.00103	-0.246234	0.805501		none
AC096543.1	0.048005	-0.142791	0.731439	-0.195219	0.845222		none
LINC00466	21.3742	-0.434985	0.111287	-3.9087	9.27949e-05	0.000203557	none
RNA5SP49	0.0289446	-0.168852	1.50964	-0.111849	0.910943		none
AC096543.2	2.56513	-0.279127	0.139711	-1.99789	0.0457282	0.0658753	none
RPSAP65	0.00428933	-0.101534	2.88795	-0.0351579	0.971954		none
FOXD3-AS1	151.745	-0.277205	0.126032	-2.19948	0.0278439	0.0419198	none
FOXD3	30.3475	-0.785861	0.1392	-5.64555	1.64654e-08	5.61646e-08	none
MIR6068	0.0201963	-0.179222	1.47077	-0.121855	0.903014		none
AL049636.1	0.305241	-0.701851	0.283436	-2.47622	0.0132782	0.0212135	none
ALG6	1274.8	-0.288373	0.0332997	-8.65991	4.72122e-18	4.07385e-17	none
ITGB3BP	880.54	-0.335166	0.0328264	-10.2102	1.78413e-24	2.71792e-23	none
BX004807.1	2.44917	-1.96981	0.15427	-12.7686	2.45582e-37	1.33574e-35	down
EFCAB7	475.749	0.0402751	0.0351778	1.1449	0.25225	0.304768	none
RN7SL488P	0.17748	-0.194051	0.278444	-0.696911	0.485858		none
RNU7-123P	2.25019	-0.340822	0.0938922	-3.62993	0.000283501	0.000582415	none
DLEU2L	19.0405	-0.29473	0.084148	-3.50252	0.000460879	0.000918643	none
AL109925.3	0
AL109925.6	0
AL109925.4	0
AL109925.2	0
AL109925.5	0
AL109925.1	0
PGM1	3667.31	-0.219184	0.0472864	-4.63524	3.56525e-06	9.36674e-06	none
RN7SL130P	6.45945	-0.729582	0.0884072	-8.25252	1.55093e-16	1.16315e-15	none
ROR1	389.395	-0.185459	0.0785066	-2.36233	0.0181604	0.0283344	none
AL161742.1	2.1569	-1.35236	0.142919	-9.46244	3.00828e-21	3.39696e-20	down
CFL1P3	1.47118	-1.10568	0.145313	-7.60895	2.7633e-14	1.67336e-13	down
RNU6-809P	0.0780297	-0.303547	1.4609	-0.207781	0.8354		none
ROR1-AS1	20.7392	-0.16696	0.106754	-1.56397	0.117824	0.155134	none
AL445205.1	3.93088	-1.92343	0.264252	-7.27879	3.36833e-13	1.83674e-12	down
UBE2U	1.93558	-1.84959	0.311984	-5.92848	3.05756e-09	1.12646e-08	down
RNU7-62P	0.0107146	-0.132623	2.6604	-0.049851	0.960241		none
CACHD1	862.277	0.31025	0.0651941	4.75888	1.94675e-06	5.27282e-06	none
MIR4794	0.104492	-0.422726	0.971299	-0.435218	0.663404		none
RAVER2	1247.54	-0.245235	0.056032	-4.37669	1.20494e-05	2.95929e-05	none
JAK1	12140.7	0.249776	0.0333264	7.49483	6.63835e-14	3.87292e-13	none
AL606517.2	1.34211	-3.36621	0.456099	-7.38043	1.57777e-13	8.88572e-13	down
AL606517.1	1.75491	-3.69586	0.38891	-9.50312	2.03694e-21	2.34321e-20	down
LINC01359	48.7239	-0.265435	0.089633	-2.96136	0.00306284	0.00542399	none
SLC2A3P2	7.05591	-0.559052	0.131211	-4.2607	2.03784e-05	4.87234e-05	none
AL357078.2	3.99163	-0.620668	0.118499	-5.23776	1.62538e-07	5.00732e-07	none
RNU6-1176P	1.08888	-2.11299	0.26004	-8.12563	4.45057e-16	3.1935e-15	down
MIR3671	6.61505	-0.154955	0.0923186	-1.67848	0.0932525	0.125867	none
MIR101-1	0.390777	-0.725294	0.241565	-3.00248	0.0026779	0.00478789	none
AL357078.1	0.210058	-0.183107	0.228853	-0.800108	0.423648	0.478794	none
MRPS21P1	0.218908	-0.189671	0.226188	-0.838556	0.401719	0.45725	none
AK4	2734.43	-0.248696	0.0759292	-3.27537	0.00105523	0.00199988	none
RPS29P7	0.385381	-0.917177	0.355117	-2.58274	0.00980184	0.016027	none
DNAJC6	370.498	0.0160092	0.0891983	0.179478	0.857562	0.879642	none
AL139294.1	0.528732	-1.43818	0.384765	-3.73781	0.000185631	0.000390372	down
COX6CP13	0.489208	-1.14387	0.395498	-2.89223	0.00382514	0.00667764	down
RNU2-15P	0.0262145	-0.189582	1.51549	-0.125097	0.900447		none
LEPROT	6013.18	0.1744	0.0287312	6.07006	1.27865e-09	4.91268e-09	none
LEPR	679.788	0.656763	0.0690256	9.51478	1.821e-21	2.10236e-20	none
AC119800.1	2.2067	-0.930044	0.117504	-7.91497	2.47304e-15	1.65675e-14	none
AC097063.1	0.998106	-2.32084	0.303633	-7.64355	2.11316e-14	1.29435e-13	down
AL513493.1	1.49373	-0.129728	0.157837	-0.821906	0.41113	0.466506	none
RN7SL854P	0.379039	-1.94002	0.815773	-2.37814	0.0174003	0.0272341	down
PDE4B	3147.15	-0.459722	0.0838329	-5.48379	4.16317e-08	1.36353e-07	none
PDE4B-AS1	1.11587	-3.03297	0.410747	-7.38404	1.53558e-13	8.65791e-13	down
RNU4-88P	0.214246	-0.543728	0.757561	-0.717735	0.47292	0.527116	none
SGIP1	442.484	-0.248578	0.0689526	-3.60505	0.000312091	0.000637583	none
MIR3117	1.0622	-1.6633	0.217232	-7.65678	1.90645e-14	1.17255e-13	down
AL139147.1	11.9333	-0.815441	0.104092	-7.83386	4.73113e-15	3.08512e-14	none
TCTEX1D1	35.1769	0.034063	0.0575465	0.591921	0.553903	0.604525	none
INSL5	1.75641	-0.365963	0.13039	-2.80669	0.00500531	0.00858803	none
DNAI4	412.175	0.288255	0.0564938	5.10241	3.35355e-07	9.94635e-07	none
AL592161.1	0.303207	-0.645946	0.374795	-1.72347	0.0848041	0.115549	none
MIER1	2960.25	0.0366834	0.0311059	1.17931	0.238276	0.289932	none
SLC35D1	2000.86	0.162426	0.0400766	4.05287	5.05924e-05	0.000114988	none
C1orf141	0.575223	-0.243192	0.27765	-0.875894	0.381088	0.436818	none
AL133320.1	0.0151727	-0.142974	2.58872	-0.0552297	0.955955		none
AL133320.2	0.616377	-0.704918	0.218699	-3.22324	0.00126749	0.00237564	none
IL23R	4.19406	-0.498474	0.115151	-4.32886	1.49882e-05	3.64147e-05	none
RNU6-586P	0.0122572	-0.106704	2.63128	-0.0405521	0.967653		none
RNU4ATAC4P	0.0253116	-0.127392	1.73075	-0.0736054	0.941324		none
DNAJB6P4	0.255756	-0.227797	0.199741	-1.14046	0.254095	0.30674	none
IL12RB2	457.837	-1.20004	0.132614	-9.04909	1.44164e-19	1.39973e-18	down
SERBP1	17219.4	-0.242498	0.0311913	-7.77452	7.57332e-15	4.84265e-14	none
RNU6-387P	2.81606	-0.316366	0.0898982	-3.51916	0.00043292	0.000866652	none
LINC01702	0.176729	-0.413024	0.435775	-0.947793	0.343235		none
RNU6-1031P	0.0182825	-0.132592	2.07028	-0.0640457	0.948934		none
AL590559.1	0.0613649	-0.0804973	0.628322	-0.128115	0.898058		none
RN7SL392P	0.0505932	-0.350187	1.37979	-0.253797	0.799652		none
HNRNPCP9	0.233922	-0.116306	0.224865	-0.517225	0.604999	0.651878	none
GADD45A	1413.42	0.129987	0.0547858	2.37263	0.0176619	0.0276107	none
GNG12	6956.37	0.311214	0.0501795	6.20201	5.57466e-10	2.2244e-09	none
RNU7-80P	0.809483	-2.9181	0.631881	-4.61811	3.8726e-06	1.0122e-05	down
GNG12-AS1	37.3946	0.206456	0.0736328	2.80386	0.00504946	0.0086598	none
AL157407.1	0.289758	-0.423414	0.274047	-1.54504	0.122337	0.160473	none
DIRAS3	207.362	0.75624	0.108947	6.94136	3.88357e-12	1.92367e-11	none
ARL5AP3	0.874254	0.454214	0.160907	2.82284	0.0047601	0.00819229	none
WLS	2891.36	0.403139	0.0737603	5.46553	4.61533e-08	1.50393e-07	none
CTBP2P8	6.60945	0.0373642	0.0867926	0.4305	0.666832	0.709159	none
MIR1262	0.378085	-0.905401	0.413319	-2.19056	0.0284836	0.0428038	none
RPS7P4	18.9131	-0.577111	0.0600152	-9.61607	6.83941e-22	8.22675e-21	none
COX6B1P7	0.0163585	-0.158512	1.96458	-0.0806848	0.935693		none
ELOCP18	0.0751538	-0.189357	0.611095	-0.309864	0.756664		none
AL139413.1	0.0368956	-0.148094	1.62778	-0.0909794	0.927509		none
RPE65	3.84048	-0.371023	0.147997	-2.50697	0.0121773	0.0195711	none
DEPDC1	748.567	-0.975855	0.0729087	-13.3846	7.4374e-41	5.89963e-39	none
AL138789.1	3.6117	-0.788416	0.110916	-7.10825	1.17528e-12	6.10496e-12	none
DEPDC1-AS1	3.94305	-1.33674	0.114343	-11.6906	1.42295e-31	4.25159e-30	down
TXNP2	0.0441937	-0.210237	1.00461	-0.209271	0.834236		none
AL035412.1	0.607178	-1.13748	0.228663	-4.97446	6.54299e-07	1.87364e-06	down
AL033530.1	10.7888	-1.55237	0.249001	-6.23438	4.53565e-10	1.82608e-09	down
AL691520.1	0.425865	-0.849683	0.398174	-2.13395	0.0328471	0.0487271	none
LINC01707	0.39242	-0.382011	0.26727	-1.4293	0.152917	0.196022	none
LINC02791	0.0787972	-0.261983	1.23614	-0.211936	0.832157		none
LINC01758	0.100898	-0.132253	0.757069	-0.174691	0.861322		none
AL359894.1	1.08088	-2.25963	0.386277	-5.84976	4.92296e-09	1.77489e-08	down
LRRC7	39.1887	-0.469764	0.0635131	-7.39634	1.39988e-13	7.9327e-13	none
SGO1P1	0.0817718	-0.339694	1.02784	-0.330495	0.741026		none
AL117353.1	0.369006	-1.5244	0.492668	-3.09417	0.00197364	0.00359572	down
RN7SL538P	0.355356	-1.70427	0.84291	-2.02189	0.043188	0.0625516	none
PIN1P1	0.279593	-0.471377	0.252834	-1.86437	0.0622694	0.0873596	none
LRRC7-AS1	0.110341	-0.173779	0.993435	-0.174928	0.861136		none
LRRC40	995.263	-0.156143	0.0335297	-4.65684	3.21095e-06	8.47767e-06	none
RN7SL242P	0.392512	-1.38635	0.456	-3.04024	0.00236387	0.00425733	down
SRSF11	8617.07	-0.0303465	0.0263167	-1.15313	0.248858	0.301205	none
AL353771.1	1.44471	-2.46518	0.228728	-10.7778	4.3841e-27	8.52807e-26	down
ANKRD13C	1698.01	-0.0278815	0.0254451	-1.09575	0.273188	0.32691	none
HHLA3	472.871	-0.369232	0.048928	-7.54644	4.47318e-14	2.64903e-13	none
HHLA3-AS1	3.78734	-0.202496	0.0833207	-2.43032	0.0150853	0.0238599	none
CTH	227.606	-0.0467369	0.0515298	-0.906987	0.364414	0.420139	none
AL354872.1	11.6806	-0.351901	0.0676053	-5.20522	1.93763e-07	5.91599e-07	none
CHORDC1P5	0.199986	-0.245548	0.268144	-0.915729	0.359809	0.415488	none
CASP3P1	0.04787	-0.142847	1.14068	-0.12523	0.900341		none
LINC01788	10.9595	0.160038	0.10994	1.45569	0.145479	0.187467	none
AL513285.1	0.0241969	-0.158502	1.82385	-0.086905	0.930747		none
PTGER3	2261.94	0.697972	0.0959819	7.27191	3.54435e-13	1.9285e-12	none
AL031429.1	3.55333	-0.705843	0.133515	-5.28663	1.24593e-07	3.88157e-07	none
AL031429.2	36.9517	0.429668	0.115279	3.72719	0.000193628	0.000406065	none
ZRANB2-AS1	6.34468	-0.294273	0.0831842	-3.5376	0.000403776	0.000812265	none
ZRANB2	3855.43	-0.0874432	0.0275975	-3.16852	0.00153218	0.00283769	none
MIR186	14.9994	0.151747	0.0840836	1.80471	0.0711199	0.0985741	none
ZRANB2-AS2	60.1202	-0.329827	0.0623299	-5.29163	1.21234e-07	3.78112e-07	none
AL358453.1	0.291189	-0.276649	0.295006	-0.937775	0.34836	0.403692	none
NEGR1	893.084	0.75272	0.0847534	8.8813	6.60812e-19	6.09388e-18	none
AL354949.1	0.601295	-1.06408	0.309243	-3.44092	0.000579747	0.00114086	down
AL359821.1	0.18885	-0.29319	0.415467	-0.705689	0.480382		none
NEGR1-IT1	0.153974	-0.453934	0.839434	-0.540762	0.588672		none
GDI2P2	4.60887	-0.626684	0.0831551	-7.53633	4.83397e-14	2.85214e-13	none
AL513166.1	7.14591	-0.205977	0.102247	-2.01451	0.0439562	0.0635431	none
RPL31P12	0.674405	-0.480138	0.161197	-2.97858	0.00289584	0.00514757	none
AL583808.1	3.35382	-1.10594	0.263181	-4.20221	2.64325e-05	6.22976e-05	down
RNU6-1246P	0.067178	-0.246546	1.41266	-0.174526	0.861452		none
LINC02796	0.319676	-0.717652	0.4663	-1.53903	0.123796	0.162216	none
LINC02797	0.398876	-0.938882	0.357314	-2.62761	0.00859869	0.0141891	none
AL732618.1	0.0170696	-0.153311	1.47908	-0.103653	0.917445		none
KRT8P21	0.657174	-0.207692	0.153248	-1.35527	0.175331	0.221225	none
RN7SKP19	0.0177566	-0.179251	1.95556	-0.0916625	0.926966		none
LINC01360	0.123548	-0.147681	0.644769	-0.229045	0.818834		none
LINC02238	0.0733118	-0.0701371	0.825956	-0.0849163	0.932328		none
RNA5SP50	0.0242385	-0.153344	2.7118	-0.0565471	0.954906		none
AL591463.1	0.548455	0.0238133	0.239824	0.0992951	0.920904	0.933041	none
RNU4ATAC8P	0.00501416	-0.101544	2.88795	-0.0351611	0.971951		none
LRRIQ3	86.9949	0.216048	0.0644092	3.3543	0.000795647	0.00153479	none
FPGT	1103.49	0.105707	0.0336951	3.13715	0.00170597	0.00313727	none
FPGT-TNNI3K	31.963	0.0676726	0.0837091	0.808426	0.418846	0.47406	none
TNNI3K	2.3102	-0.236421	0.114992	-2.05598	0.0397842	0.058074	none
AC093158.1	2.79567	-0.213136	0.113511	-1.87766	0.0604275	0.0849883	none
AC105271.1	1.42942	0.06549	0.153462	0.426751	0.669561	0.711547	none
LRRC53	3.54826	-0.494632	0.277743	-1.7809	0.0749287	0.103325	none
ERICH3	210.765	0.801872	0.149523	5.36287	8.19102e-08	2.60026e-07	none
ERICH3-AS1	0.675919	-0.24492	0.240845	-1.01692	0.309193	0.363893	none
AC135803.1	11.8728	-0.383511	0.082212	-4.6649	3.08771e-06	8.16815e-06	none
CRYZ	2191.38	0.0630084	0.0454024	1.38778	0.165205	0.210048	none
TYW3	1358.48	0.0883515	0.0309787	2.85201	0.00434435	0.00751902	none
AC133865.1	0.0838593	-0.324202	1.16393	-0.278541	0.780597		none
AC099786.3	0.409783	-1.3954	0.553054	-2.52308	0.0116333	0.0187596	down
AC099786.1	0.414004	-1.38396	0.394139	-3.51134	0.000445855	0.000890677	down
LHX8	9.87634	-1.3256	0.169821	-7.80584	5.9107e-15	3.81874e-14	down
AC099786.2	0.569231	-1.28079	0.287795	-4.45036	8.57276e-06	2.14645e-05	down
[truncated: 57,429 more rows]
